# Supplementary material for: Arabidopsis phenotyping through geometric morphometrics
Source: PubMed Central journal article supplement (PMC6041757; doi:10.1093/gigascience/giy073), 2018-06-18

|                                                      |                                                                                                                                                                                                                                                                                                                                                                                                                                                                                                                                                                                                                                                                                                                                                                                                                                                                                                                                                                                                                                                                                                                                                                                                                                                                                                                                                                                                                                                                                                                                                                                                                                                                                                                                                                                                                                                                                                                        |                        |
|------------------------------------------------------|------------------------------------------------------------------------------------------------------------------------------------------------------------------------------------------------------------------------------------------------------------------------------------------------------------------------------------------------------------------------------------------------------------------------------------------------------------------------------------------------------------------------------------------------------------------------------------------------------------------------------------------------------------------------------------------------------------------------------------------------------------------------------------------------------------------------------------------------------------------------------------------------------------------------------------------------------------------------------------------------------------------------------------------------------------------------------------------------------------------------------------------------------------------------------------------------------------------------------------------------------------------------------------------------------------------------------------------------------------------------------------------------------------------------------------------------------------------------------------------------------------------------------------------------------------------------------------------------------------------------------------------------------------------------------------------------------------------------------------------------------------------------------------------------------------------------------------------------------------------------------------------------------------------------|------------------------|
| <b>Manuscript Number:</b>                            | GIGA-D-17-00284R2                                                                                                                                                                                                                                                                                                                                                                                                                                                                                                                                                                                                                                                                                                                                                                                                                                                                                                                                                                                                                                                                                                                                                                                                                                                                                                                                                                                                                                                                                                                                                                                                                                                                                                                                                                                                                                                                                                      |                        |
| <b>Full Title:</b>                                   | Arabidopsis phenotyping through Geometric Morphometrics                                                                                                                                                                                                                                                                                                                                                                                                                                                                                                                                                                                                                                                                                                                                                                                                                                                                                                                                                                                                                                                                                                                                                                                                                                                                                                                                                                                                                                                                                                                                                                                                                                                                                                                                                                                                                                                                |                        |
| <b>Article Type:</b>                                 | Research                                                                                                                                                                                                                                                                                                                                                                                                                                                                                                                                                                                                                                                                                                                                                                                                                                                                                                                                                                                                                                                                                                                                                                                                                                                                                                                                                                                                                                                                                                                                                                                                                                                                                                                                                                                                                                                                                                               |                        |
| <b>Funding Information:</b>                          | Fondo para la Investigación Científica y Tecnológica (PICT 2014-1163)                                                                                                                                                                                                                                                                                                                                                                                                                                                                                                                                                                                                                                                                                                                                                                                                                                                                                                                                                                                                                                                                                                                                                                                                                                                                                                                                                                                                                                                                                                                                                                                                                                                                                                                                                                                                                                                  | Dr Sebastian Asurmendi |
|                                                      | Instituto Nacional de Tecnología Agropecuaria (INTA) (PE 11310022)                                                                                                                                                                                                                                                                                                                                                                                                                                                                                                                                                                                                                                                                                                                                                                                                                                                                                                                                                                                                                                                                                                                                                                                                                                                                                                                                                                                                                                                                                                                                                                                                                                                                                                                                                                                                                                                     | Dr Sebastian Asurmendi |
| <b>Abstract:</b>                                     | <p>Recently, much technical progress was done regarding plant phenotyping. High-throughput platforms and the development of improved algorithms for the rosette image segmentation make now possible to massively extract shape and size parameters for genetic, physiological and environmental studies. The development of low-cost phenotyping platforms and freeware resources make it possible to widely expand phenotypic analysis tools for Arabidopsis. However, objective descriptors of shape parameters that could be used independently of platform and segmentation software used are still lacking and shape descriptions still rely on ad hoc or even sometimes contradictory descriptors, which could make comparisons difficult and perhaps inaccurate. Modern geometric morphometrics is a family of methods in quantitative biology proposed to be the main source of data and analytical tools in the emerging field of phenomics studies. Based on the location of landmarks (corresponding points) over imaged specimens and by combining geometry, multivariate analysis and powerful statistical techniques, these tools offer the possibility to reproducibly and accurately account for shape variations amongst groups and measure them in shape distance units. Here, it is proposed a particular scheme of landmarks placement on Arabidopsis rosette images to study shape variation in the case of viral infection processes. Shape differences between controls and infected plants are quantified throughout the infectious process and visualized. Quantitative comparisons between two unrelated ssRNA+ viruses are shown and reproducibility issues are assessed. Combined with the newest automated platforms and plant segmentation procedures, geometric morphometric tools could boost phenotypic features extraction and processing in an objective, reproducible manner.</p> |                        |
| <b>Corresponding Author:</b>                         | Sebastian Asurmendi<br>Instituto Nacional de Tecnología Agropecuaria<br>Hurlingham, Buenos Aires ARGENTINA                                                                                                                                                                                                                                                                                                                                                                                                                                                                                                                                                                                                                                                                                                                                                                                                                                                                                                                                                                                                                                                                                                                                                                                                                                                                                                                                                                                                                                                                                                                                                                                                                                                                                                                                                                                                             |                        |
| <b>Corresponding Author Secondary Information:</b>   |                                                                                                                                                                                                                                                                                                                                                                                                                                                                                                                                                                                                                                                                                                                                                                                                                                                                                                                                                                                                                                                                                                                                                                                                                                                                                                                                                                                                                                                                                                                                                                                                                                                                                                                                                                                                                                                                                                                        |                        |
| <b>Corresponding Author's Institution:</b>           | Instituto Nacional de Tecnología Agropecuaria                                                                                                                                                                                                                                                                                                                                                                                                                                                                                                                                                                                                                                                                                                                                                                                                                                                                                                                                                                                                                                                                                                                                                                                                                                                                                                                                                                                                                                                                                                                                                                                                                                                                                                                                                                                                                                                                          |                        |
| <b>Corresponding Author's Secondary Institution:</b> |                                                                                                                                                                                                                                                                                                                                                                                                                                                                                                                                                                                                                                                                                                                                                                                                                                                                                                                                                                                                                                                                                                                                                                                                                                                                                                                                                                                                                                                                                                                                                                                                                                                                                                                                                                                                                                                                                                                        |                        |
| <b>First Author:</b>                                 | Carlos Augusto Manacorda                                                                                                                                                                                                                                                                                                                                                                                                                                                                                                                                                                                                                                                                                                                                                                                                                                                                                                                                                                                                                                                                                                                                                                                                                                                                                                                                                                                                                                                                                                                                                                                                                                                                                                                                                                                                                                                                                               |                        |
| <b>First Author Secondary Information:</b>           |                                                                                                                                                                                                                                                                                                                                                                                                                                                                                                                                                                                                                                                                                                                                                                                                                                                                                                                                                                                                                                                                                                                                                                                                                                                                                                                                                                                                                                                                                                                                                                                                                                                                                                                                                                                                                                                                                                                        |                        |
| <b>Order of Authors:</b>                             | Carlos Augusto Manacorda<br>Sebastian Asurmendi                                                                                                                                                                                                                                                                                                                                                                                                                                                                                                                                                                                                                                                                                                                                                                                                                                                                                                                                                                                                                                                                                                                                                                                                                                                                                                                                                                                                                                                                                                                                                                                                                                                                                                                                                                                                                                                                        |                        |
| <b>Order of Authors Secondary Information:</b>       |                                                                                                                                                                                                                                                                                                                                                                                                                                                                                                                                                                                                                                                                                                                                                                                                                                                                                                                                                                                                                                                                                                                                                                                                                                                                                                                                                                                                                                                                                                                                                                                                                                                                                                                                                                                                                                                                                                                        |                        |
| <b>Response to Reviewers:</b>                        | <p>Dear Dr. Hans Zauner,</p> <p>We are pleased to resubmit the paper "Arabidopsis phenotyping through Geometric Morphometrics" revision 2 .</p> <p>We believe that the manuscript has been considerably improved and we hope it will</p>                                                                                                                                                                                                                                                                                                                                                                                                                                                                                                                                                                                                                                                                                                                                                                                                                                                                                                                                                                                                                                                                                                                                                                                                                                                                                                                                                                                                                                                                                                                                                                                                                                                                               |                        |

were able to meet the requirements to be considered for publication in GIGAScience.

Yours sincerely,

Carlos A. Manacorda and Sebastián Asurmendi

#### Global response

Our aim in this work was to apply GM tools to address the general question of whether differences in rosette shape exist between two experimental conditions applied to *Arabidopsis* in an experimental context. This purpose aimed to be able to statistically quantify the shape differences between treatments in order to establish objective global comparison on a matter that is usually in some way subjective, as virus phenotype severity for example. Taking individual measurements (angles, petioles and/or laminae lengths, etc.), could indeed give valuable information, but the comparative analysis of shape as a whole needs the application of GM tools, whose mathematical approach allows to simultaneously consider the relative displacements of all selected landmarks taken together. By doing so, a single measure (Procrustes distance) gives the morphometric distance from one shape to the other one (the reference, for example, that could be the mean shape of control plants). Classic morphometric measures have their own problems. For example, it is indeed possible, using the same set of landmarks used here and the same software (TPSDig2), to take measurement distances from the center of the rosette to the end of one petiole, from that point to the tip of the leaf under study and from the center to the tip. However, when several measurements radiate from a single point their values cannot be completely independent; any error in locating that point affects all of these measurements. Such a data set contains less information than could have been collected with no greater effort because some directions are measured redundantly and many measurements overlap (Zelditch, 2012). Similar problems could arise if we had measured successive angles between leaves, as Tim Dickinson properly note (circularity of the data), and this is precisely what we had not done.

#### Particular responses

Although we do not agree with Dr. Dickinson's statement that "The authors neglect to demonstrate a problem that their method solves with reference to actual plants." we have done an effort to clarify the understanding of this issue based on the reviewer comments.

We stated in the original manuscript (Page 3, last paragraph) that "This work aims to introduce the use of GM tools for the analysis of *Arabidopsis* rosette phenotypes in an objective and repeatable way. Viral infections are used as case studies to exemplify the potentially usefulness of these techniques to quantitatively reveal shape changes using this plant model".

We changed to

"This work aims to introduce the use of GM tools for the analysis of the *Arabidopsis* rosette. Its purpose is to statistically quantify the shape differences between treatments in order to establish objective global comparisons on a matter that is usually subjective, virus phenotype severity. Viral infections are used as case studies to exemplify the potentially usefulness of these techniques to quantitatively reveal shape changes using this plant model. As such, it is not intended to offer a complete introductory explanation of each GM tool, an objective that is beyond the scope of this paper. Such a task was already performed by [33] and for a complete introductory explanation of GM tools applied in biological systems it is recommended the lecture of [41]. Software used in this work frequently has its own user's manual and informative examples [42–44]. Nevertheless, with the purpose to facilitate the comprehension of this work to newcomers in the field of GM, each tool is briefly described in the Methods section."

We used actual plants, throughout the study, to demonstrate that viral infections not only affect rosettes' size (Fig. 2) but also their shape (Figs. 4 to 9 and associated Tables and Suppl. Tables). This effect should not be taken for granted prior to size and shape separation by GM analyses (one cannot exclude a priori a "freezing effect" of the virus that affected size but not shape). Secondly, by performing three independent experiments, we found that the rosette shape is more severely impacted by TuMV than ORMV (Fig. 9A vs. B, D vs. F, and Table 1 vs. Suppl. Table 6). Again, this effect

is by no means obvious prior to analyses. The comparison of phenotypic trajectories (PTA, Fig. 9A and B and the associated Table 2) quantified the difference and allowed us to find that, based on trajectory divergence angles and trajectory shape differences TuMV is a more severe virus regarding Arabidopsis rosette shape along the infection time frame. Of course more subtle problems could be addressed using these tools, but this initial work aims to illustrate the capabilities and potential of GM in the field.

Dr. Dickinson stated that “As I understand it, the authors seek to automate the comparison of rosettes so as to analyze the effect of the virus, and perhaps also detect plants in which virus symptoms have appeared”. Whereas he is right in saying that we are interested in the analyses of virus effect and the potential to detect infections by image, regarding automation we only suggested in the Discussion that GM tools could be added to existing software packages (or used to develop newly, dedicated ones), but we performed our landmarks assignment manually here, i. e., without any implementation of automation at this step (we stated it at the M&M section). As mentioned previously the main objective was to establish a quantitative measurement of global shape differences in Arabidopsis that could be automated later on.

Dr. Dickinson follows stating that: “If this really is their objective then I think they need more than the existing Fig. 1 in this ms to demonstrate what they are attempting to do. If the authors' Fig. 1 is revised to meet this concern, then readers can evaluate for themselves whether the authors have succeeded with the great lengths to which they have gone to employ geometric morphometric methods to detect changes in divergence angle between leaves in a rosette, and changes in petiole and blade lengths.”, we have deposited at journal database all images datasets for all three independent experiments at each DPI, along with the .TPS and .morphoJ files that are the input and output of the main analyses and upon which the main conclusion of this work is based on. The interested reader would be fully capable not only to visually inspect every rosette but also to re-run the entire analysis. Fig. 1 only depicts a representative rosette at 8 DPI, with illustrative aims. We modified a sentence in Fig. 1 caption to further clarify this point: Removed: Landmark configuration in an Arabidopsis rosette. Introduced: Landmark configuration in a representative Arabidopsis rosette. We also slightly modified the sentence introducing Fig. 1 in the main text to make it clearer: (Removed: An 11-landmark configuration for the Arabidopsis rosette is shown in Figure 1A. Introduced : An 11-landmark configuration for a representative Arabidopsis rosette is shown in Figure 1A.).

For the demonstration that our approach here is capable of detecting infected plants, we have done DA analyses (Fig. 5, Suppl. Table 4 including comparison with Human Observers). Again, the interested reader can download the Dataset at every DPI to assign treatments visually and compare her results with those obtained here applying GM tools. With respect to the last observation made by Dr. Dickinson here about divergence angles and petioles and blade lengths, we want again to emphasize that all differences found are relative to the whole shape change of the structure under consideration here (i.e., the rosette as spatially defined by the landmarks we positioned). We did not state that any structure is more or less lengthy, for example, in absolute terms, but in relative ones (relative to the shape change of the whole configuration). Nonetheless, we think that Dr. Dickinson raises an interesting question here that points out to the possible origin of the (relatively) distorted inter-leaves angles and how to measure them.

Because of that, we introduced a short paragraph in the Discussion to further clarify this issue (“It is important to note here that we did not perform absolute individual angle or distances measurements. This kind of traditional morphometric measurements could also be manually taken by using TPSDig2 software and would be an addition to the parameters presented here, where the focus is only on geometric morphometric tools. However, the normal leaf phyllotactic pattern (the arrangement of organs in regular patterns around the stem of a plant) seems not to be changed by these viruses (personal observations, data not shown). Instead, the distortion of the angle determined by the tip of two successive leaves (with its vertex in the center of the plant) appears to arise from the relative outgrowth of the distal part of the lamina”). Below we added a brief paragraph also stating that “In this particular study, the observance of the relative shortening of petioles or laminae, and the distorted inter-leaves angles could lead to further experiments to more precisely quantify these discrete phenotypes using also traditional morphometric measurements. These

|                                                                                                                                                                                                                                                                                                                                                                                                                                                                                                                                     |                                                                                                                                                                                                                                                                                                                                                                                                                                                                                                                                                                                                                                                                                                                                                                                                                                                                                                                                                                                                                                                                                                                                                                                                                                                                           |
|-------------------------------------------------------------------------------------------------------------------------------------------------------------------------------------------------------------------------------------------------------------------------------------------------------------------------------------------------------------------------------------------------------------------------------------------------------------------------------------------------------------------------------------|---------------------------------------------------------------------------------------------------------------------------------------------------------------------------------------------------------------------------------------------------------------------------------------------------------------------------------------------------------------------------------------------------------------------------------------------------------------------------------------------------------------------------------------------------------------------------------------------------------------------------------------------------------------------------------------------------------------------------------------------------------------------------------------------------------------------------------------------------------------------------------------------------------------------------------------------------------------------------------------------------------------------------------------------------------------------------------------------------------------------------------------------------------------------------------------------------------------------------------------------------------------------------|
|                                                                                                                                                                                                                                                                                                                                                                                                                                                                                                                                     | <p>traditional measurements however should be carried on taking into account its intrinsic statistic limitations (see [41], Introduction).” We rearranged this section of the Discussion hoping the reader could better understand our point here.</p> <p>As for the Editor’s comment on the exact meaning of “image segmentation”, we clarified further what we meant, trying to aid the reader coming from other fields to fully understand our point here. In the Background section We Removed: “Freely available software that overcome the difficult task of rosette segmentation (an issue still under investigation) have been developed by different means (...)” and Introduced: “Freely available software that overcome the difficult task of image rosette segmentation (i. e. the computational separation of the living plant tissue from the substrate background) is an issue still under investigation and have been developed by different means (...)”.</p> <p>We also had our ms. revised and modified by a specialized person to improve its language and grammar.</p> <p>We therefore hope we had clarified the points raised both by the Editor and Reviewer #3. We nonetheless remain open to further suggestions to improve our Manuscript.</p> |
| <b>Additional Information:</b>                                                                                                                                                                                                                                                                                                                                                                                                                                                                                                      |                                                                                                                                                                                                                                                                                                                                                                                                                                                                                                                                                                                                                                                                                                                                                                                                                                                                                                                                                                                                                                                                                                                                                                                                                                                                           |
| <b>Question</b>                                                                                                                                                                                                                                                                                                                                                                                                                                                                                                                     | <b>Response</b>                                                                                                                                                                                                                                                                                                                                                                                                                                                                                                                                                                                                                                                                                                                                                                                                                                                                                                                                                                                                                                                                                                                                                                                                                                                           |
| Are you submitting this manuscript to a special series or article collection?                                                                                                                                                                                                                                                                                                                                                                                                                                                       | No                                                                                                                                                                                                                                                                                                                                                                                                                                                                                                                                                                                                                                                                                                                                                                                                                                                                                                                                                                                                                                                                                                                                                                                                                                                                        |
| <p><b>Experimental design and statistics</b></p> <p>Full details of the experimental design and statistical methods used should be given in the Methods section, as detailed in our <a href="#">Minimum Standards Reporting Checklist</a>. Information essential to interpreting the data presented should be made available in the figure legends.</p> <p>Have you included all the information requested in your manuscript?</p>                                                                                                  | Yes                                                                                                                                                                                                                                                                                                                                                                                                                                                                                                                                                                                                                                                                                                                                                                                                                                                                                                                                                                                                                                                                                                                                                                                                                                                                       |
| <p><b>Resources</b></p> <p>A description of all resources used, including antibodies, cell lines, animals and software tools, with enough information to allow them to be uniquely identified, should be included in the Methods section. Authors are strongly encouraged to cite <a href="#">Research Resource Identifiers</a> (RRIDs) for antibodies, model organisms and tools, where possible.</p> <p>Have you included the information requested as detailed in our <a href="#">Minimum Standards Reporting Checklist</a>?</p> | Yes                                                                                                                                                                                                                                                                                                                                                                                                                                                                                                                                                                                                                                                                                                                                                                                                                                                                                                                                                                                                                                                                                                                                                                                                                                                                       |
| <p><b>Availability of data and materials</b></p> <p>All datasets and code on which the</p>                                                                                                                                                                                                                                                                                                                                                                                                                                          | Yes                                                                                                                                                                                                                                                                                                                                                                                                                                                                                                                                                                                                                                                                                                                                                                                                                                                                                                                                                                                                                                                                                                                                                                                                                                                                       |

conclusions of the paper rely must be either included in your submission or deposited in [publicly available repositories](#) (where available and ethically appropriate), referencing such data using a unique identifier in the references and in the “Availability of Data and Materials” section of your manuscript.

Have you have met the above requirement as detailed in our [Minimum Standards Reporting Checklist](#)?

[Click here to view linked References](#)

# 1 Arabidopsis phenotyping through Geometric Morphometrics

2  
3 Carlos A. Manacorda<sup>1</sup> and Sebastian Asurmendi <sup>1,2</sup>.

4  
5 <sup>1</sup> Instituto de Biotecnología, CICVyA, INTA, Argentina <sup>2</sup> CONICET, Argentina.

6  
7  
8

## 9 Abstract

10 **Background:** Recently, much technical progress was achieved in the field of plant phenotyping. High-  
11 throughput platforms and the development of improved algorithms for rosette image segmentation make it now  
12 possible to extract shape and size parameters for genetic, physiological and environmental studies on a large  
13 scale. The development of low-cost phenotyping platforms and freeware resources make it possible to widely  
14 expand phenotypic analysis tools for Arabidopsis. However, objective descriptors of shape parameters that  
15 could be used independently of platform and segmentation software used are still lacking and shape  
16 descriptions still rely on *ad hoc* or even sometimes contradictory descriptors, which could make comparisons  
17 difficult and perhaps inaccurate. Modern geometric morphometrics is a family of methods in quantitative  
18 biology proposed to be the main source of data and analytical tools in the emerging field of phenomics studies.  
19 Based on the location of landmarks (corresponding points) over imaged specimens and by combining  
20 geometry, multivariate analysis and powerful statistical techniques, these tools offer the possibility to  
21 reproducibly and accurately account for shape variations amongst groups and measure them in shape distance  
22 units.

23 **Results:** Here, a particular scheme of landmarks placement on Arabidopsis rosette images is proposed to study  
24 shape variation in the case of viral infection processes. Shape differences between controls and infected plants  
25 are quantified throughout the infectious process and visualized. Quantitative comparisons between two  
26 unrelated ssRNA+ viruses are shown and reproducibility issues are assessed.

27 **Conclusion:** Combined with the newest automated platforms and plant segmentation procedures, geometric  
28 morphometric tools could boost phenotypic features extraction and processing in an objective, reproducible  
29 manner.

30  
31  
32

33

34

35

36

37

38

39

40

41

42

43

44

45

46

47

## 28 Background

29 Plant phenotyping is the process of recording quantitative and qualitative plant traits and is essential to study  
30 plant responses to the environment [1]. A survey of the International Plant Phenotyping Network (IPPN)[2]  
31 among plant scientists found that most participants think that plant phenotyping will play an important role in  
32 the future. The selected topics of main interest were the assessment of abiotic, biotic and multiple stress and  
33 the model plant *Arabidopsis thaliana*. Recently, many new techniques have been developed to facilitate and  
34 improve quantitative plant phenomics (i.e. the full set of phenotypic features of an individual), going from  
35 destructive to non-destructive and even high-throughput phenotyping (the use of cameras and automated  
36 platforms to automatically extract phenotypic features on hundreds of plants per day) [3–5]. Whereas the  
37 throughput is an important aspect of phenotyping, spatial and temporal resolutions, as well as accuracy, should  
38 be considered [6].

39 Freely available software that overcome the difficult task of image rosette segmentation (i. e. the  
40 computational separation of the living plant tissue from the substrate background) is an issue still under  
41 investigation and have been developed by different means [7–11]. These software packages allow the  
42 assessment of several rosette parameters such as area, perimeter and other more complex descriptors. However,  
43 the persistence of *ad hoc* descriptors [12,13] and lack of a gold standard could give rise to reproducibility  
44 issues, because of different growing substrate-segmentation algorithm combinations. Moreover, different  
45 approaches sometimes give the same name to different parameters (e.g. “roundness” in ImageJ [14] vs. [10])  
46 or different names to the same parameter (e.g. “solidity” in [11] equals “compactness” in [7,10] and “surface  
47 coverage” in [5]). The need of developing objective, mathematically and statistically sound and more accurate  
48 shape descriptors in plants has been stressed out in recent reviews on the topic [15–17]. Nonetheless, image  
49 datasets analyses require a conceptual and statistical corpus of knowledge that is not always present in a plant  
50 biologist’s research field. Plant phenotyping relies on skills and technologies that are used to characterize  
51 qualitative or quantitative traits regardless of the throughput of the analyses [1]. One such knowledge corpus  
52 is morphometrics [18].

53 Traditional morphometric analyses such as measures and ratios of length, depth and width were widely used  
54 in evolutionary biology, taxonomy etc. studies throughout the 20<sup>th</sup> century. To the end of that century the  
55 seminal work of Thompson [19] was re-evaluated under the light of multivariate analysis and novel  
56 mathematical developments [20,21], giving rise to modern geometric morphometrics (GM), in which was  
57 called a “revolution” in morphometrics [22–24].

58 GM combines geometry, multivariate morphometrics, computer science and imaging techniques for a powerful  
59 and accurate study of organismal forms. This family of methods in quantitative biology is proposed to be the  
60 main source of data and analytical tools in the emerging field of phenomics [25]. Formally, GM is “a collection

61 of approaches for the multivariate statistical analysis of Cartesian coordinate data, usually (but not always)  
2 limited to landmark point locations” [26] . Landmark methods have been successfully applied to various  
62 species, and have the advantage of being easy to understand [27]. Besides enhanced statistical power and better  
4 descriptive and graphical tools, GM allow researchers to decompose form in size and shape, and the whole  
63 configuration of the organism under study is analyzed, rather relying on the description of relative  
64 displacements of pairs of points. GM is now a mature discipline that has been widely applied in biology [28–  
8 30] (see [31] for a review). For example in plants, seeds of barley [32] and leaves of grapevine [33] and oak  
10 [34,35] were studied using GM methods.

15 Plant viruses cause important worldwide economic losses in crops [36]. Symptoms include plant stunting,  
16 changes in leaf morphology, and sometimes plant death [37] and vary depending on various aspects including  
17 genetic compatibility and environmental conditions. Even given a particular host-virus interaction, different  
18 viral strains trigger different symptomatology, which are more or less subtle for the observer to distinguish  
19 [38–40]. Comparing the severity of qualitative viral symptoms (i.e. the degree to which infected plants depart  
20 from healthy controls in some observable phenotype, often referred to aerial parts of the plant like leaves, stems  
21 or rosettes) is a difficult task performed mainly by visually rating symptoms (e.g. [41]). Consequently,  
22 morphological differences could be difficult to describe and reproducibility issues could arise.

23 *Arabidopsis thaliana*. has been extensively used in studies of influences of environmental factors on plants,  
24 paving the path to the development and testing of experimental techniques or data analysis methods [42]. The  
25 Arabidopsis rosette is a nearly two-dimensional (2D) structure in the vegetative phase [11], thereby facilitating  
26 image acquisition and interpretation. Here, it is proposed a case study where GM tools are applied to study and  
27 quantitatively describe morphometric changes triggered in *A. thaliana* plants by RNA viruses belonging to two  
28 unrelated families. It is proposed a particular selection of landmarks to locate in the Arabidopsis rosette during  
29 its vegetative phase. The study spans from the earlier stages of viral infection to later periods, when symptoms  
30 are detectable with the naked eye. Comparisons are made between discriminant power of computer-assisted  
31 classification and expert human eye. Symptoms severity triggered by both viruses is also compared, based on  
32 the relative morphometric changes induced relative to healthy controls. Changes in allometric growth,  
33 phenotypic trajectories and morphospace occupation patterns are also investigated. Size analyses are also  
34 performed. Throughout this work, several bioinformatics resources are applied, in order both to extract the  
35 higher degree of information available, but also to exemplify different and complementary possibilities that  
36 nowadays GM offers for the accurate description of shape in Arabidopsis.

37 This work aims to introduce the use of GM tools for the analysis of the Arabidopsis rosette. Its purpose is to  
38 statistically quantify the shape differences between treatments in order to establish objective global  
39 comparisons on a matter that is usually subjective, virus phenotype severity. Viral infections are used as case  
40



94 studies to exemplify the potentially usefulness of these techniques to quantitatively reveal shape changes using  
95 this plant model. As such, it is not intended to offer a complete introductory explanation of each GM tool, an  
96 objective that is beyond the scope of this paper. Such a task was already performed by [35] and for a complete  
97 introductory explanation of GM tools applied in biological systems it is recommended the lecture of [43].  
98 Software used in this work frequently has its own user's manual and informative examples [44–46].  
99 Nevertheless, with the purpose to facilitate the comprehension of this work to newcomers in the field of GM,  
100 each tool is briefly described in the Methods section.

## 102 **Materials and Methods**

### 108 **Plant growth conditions**

104 *A. thaliana* Col-0 seeds were stratified at 4°C for 3 days. Plants were grown under short days conditions (10 h  
105 light/14 h dark cycle, T(°C)= 23/21, Hr(%)= 60/65, and a light intensity of 150  $\mu\text{E m}^{-2} \text{s}^{-1}$ ) in a controlled  
106 environmental chamber (Conviroon PGR14; Conviroon, Winnipeg, Manitoba, Canada). Plants were grown in  
107 individual pots in trays and treatments were assigned to plants in all trays. One experiment was performed with  
108 ORMV and two independent experiments were carried on with TuMV-UK1.

### 109 **Virus infection assays**

110 ORMV (Oilseed Rape Mosaic Virus) [47] was maintained in *Nicotiana tabacum* (cv. Xhanti nn) and infective  
111 sap was obtained after grinding infected leaves with mortar and pestle in 50 mM phosphate buffer pH=7.5.  
112 TuMV (Turnip Mosaic Virus)-UK1 strain (accession number X65978) [48] was maintained in infected *A.*  
113 *thaliana* Col-0. Fresh sap was obtained immediately prior to use to inoculate plants with sodium sulfite buffer  
114 (1%  $\text{K}_2\text{HPO}_4$  + 0,1%  $\text{Na}_2\text{SO}_3$  [wt/vol]). Mock-inoculated plants were rubbed with carborundum dust with  
115 either 50 mM phosphate buffer pH=7.5 or sodium sulfite buffer, respectively. Plants were mechanically  
116 inoculated in their third true leaf at stage 1.08 at 21 days post-sowing, [49] because those leaves were almost  
117 fully developed by the time of the procedure and therefore constituted a source tissue for the export of virions  
118 to the rest of the plant. The number of plants assigned to each treatment in each experiment is detailed in Table  
119 2.

### 120 **Image acquisition**

121 Zenithal photographs of individual plants growing in pots were taken with a Canon PowerShot SX50HS  
122 camera mounted in a monopod at maximal resolution. Specimens were imaged at different Days Post-  
123 Inoculation (DPI) spanning from 3 to 12 DPI. Photographs were taken at the same time of the day in successive  
124 days to minimize error. A ruler was placed next to each plant at each image acquisition and only its central  
125 part (60-80 mm) was taken into account to avoid image distortion at the edges of the photograph [50].

### 126 **Landmarks configuration and digitization**

At the heart of GM analyses is the concept of landmarks. Landmarks are points that can be located precisely over a structure and correspond in a one-to-one manner among all the specimens included in a study [51]. There is no absolute landmark configuration on any given structure. The choice of the number of landmarks and their configuration depend on the hypotheses being tested [52]. Here, the focus of the analyses is on the phenotypic impact of viral infections on the Arabidopsis rosette through time. Hence, short-day conditions were chosen to maintain the vegetative phase and delay flowering (when stems and reproductive organs could mask morphological features of leaves in zenithal photographs), allowing the plant's aerial part to remain near two-dimensional during the experiment. Landmarks were chosen based in part due to its relatively easiness of recognition in an Arabidopsis rosette in vegetative phase and, to encompass as broadly as possible the phenotypic changes experienced by the plant during the infection, chosen landmarks were present from earlier stages of the infection to later ones and placed in regions that experience dramatic changes upon infection [39]. Also, selected landmarks could take into account relevant morphological changes induced by stresses or distinctive phenotypes of different ecotypes like relative shortening or lengthening of petioles and laminae, or relative lateral displacements of leaves [7,10,11]. Moreover, landmarks chosen here are probably less prone to manual digitization error than, for example, a landmark situated in the middle of the laminae or placed somewhere along the leaf's contour, a task that seems rather complicated given the serrated nature of Arabidopsis leaves and the fact that the degree and placement of serration changes along the development of successive leaves [53–55]. A relatively reduced number of landmarks can be used to describe complex forms [35,56].

The selection of landmarks is based also in the observance of five basic principles, including the basic requirements for 2D approximation [43]:

- 1) Homology (in the sense of correspondence of points). The points on one specimen correspond (as the “same” point) to that point on all individuals.
- 2) Adequate Coverage of the Form (or comprehensive coverage). Landmarks should be chosen in a way they encompass the structure over which the biological hypothesis of interest is being tested and are functional to the specific aim of a study.
- 3) Repeatability. The same landmarks should be easily identified in the same structure in order to reduce digitization error (a component of measurement error).
- 4) Consistency of Relative Position. This attribute guarantees that landmarks do not interchange relative positions.
- 5) Coplanarity. When digitizing real, 3D structures under the 2D approximation, landmarks should be placed as close as possible onto an imaginary plane to reduce the distortion associated with that approximation.

160 The TPSUtil software (a member of the TPS Series of GM tools [46] that prepares the data for further analyses)  
2 was used to create .TXT files with a .TPS extension from the directories containing the .JPG images. These  
161 were used to load the .JPG images in TPSDig2. Opening these .TPS files with TPSDig2 allows the user to  
4  
162 proceed with the digitization of landmarks. An 11-landmark configuration for the Arabidopsis rosette is shown  
6  
163 in Figure 1A. The 11 landmarks were digitized in the same order on each picture, after setting a scale factor  
8  
164 with a ruler, at each DPI. This scale factor is set in TPSDig2 selecting two points placed at a known distance  
10  
165 between them in the photograph and allows for the correction of possible differences in distances from the  
12  
166 camera objective to the specimen under study (from one day to the next, for instance). The scale factor is  
14  
167 important to measure centroid size, amongst other possible measures, but has no effect on landmark  
16  
168 coordinates, which remain in pixels units [46].  
18

170 Following Bookstein's criteria [57], landmark 11 (which is situated at the centre of the rosette) is a Type 1  
20  
171 landmark because it is the intersection of the base of all petioles, i.e., its juxtaposition and hence very locally  
22  
172 defined. Type 1 landmarks are frequently considered as optimal [43,57]. Landmarks 1, 2, 3, 4 and 5 (which  
24  
173 are located at the tip of leaves #8 to #12 and are the maxima of curvature of that structure) and landmarks 6, 7,  
26  
174 8, 9 and 10 (which are located at the intersection of the petiole and the lamina of each leaf from #8 to #12)  
28  
175 cannot be unambiguously assigned due to the continuous nature of the leaf curvature and are Type 2 landmarks.  
30  
176 Leaves below number 8 were not chosen for landmark placement for three main reasons: a) they are hidden  
31  
177 for younger leaves at later stages of infection b) these old leaves had almost finished their growth by the time  
33  
178 the first photographs were taken (and the form covered by them would be a less informative one for the process  
35  
179 of shape and size change upon viral infection) and c) the senescence process of older leaves lead to  
37  
180 morphological changes derived from dehydration and death. Younger leaves (beyond leaf number 12) were  
39  
181 not chosen because they were not present at the earlier stages of infections, therefore violating the requisite of  
40  
182 repeatability of landmarks.  
42

183 Average specimen digitization time was about 1 minute. The Output of TPSDig2 is a .TPS file containing  
44  
184 information about specimen name, scale factor, and raw coordinates of each landmark for all digitized  
46  
185 specimens. Landmark digitization was repeated a week after to estimate the digitization component of the  
48  
186 measurement error for each specimen.  
50

## 187 **Workflow**

51

188 A flowchart of data analyses throughout this paper is shown in Figure 1B. Image datasets for all DPIs and both  
53  
189 treatments were handled and digitized for further analyses using the TPSUtil and TPSDig2 software packages  
55  
190 that generate .TPS output files. Several freeware can be used to extract shape information from .TPS files [43].  
57  
191 Here, the MorphoJ software [44] was chosen mainly because of its ease to use and comprehensive tools  
59  
192 available. MorphoJ creates new datasets from several file extensions, including .TPS. The "Supplementary file  
61  
62  
63  
64  
65

193 ORMV.morphoj” was created and 16 datasets were generated, one for each DPI and digitization instance.  
194 Specimens were classified according with ID, Treatment, DPI and Digitization for each dataset. Combinations  
195 of classifiers were also done to perform further grouped analyses. Other complimentary analyses and shape  
196 change visualizations were performed by exporting output files from MorphoJ to other software packages.  
197 TuMV analyses were done in the same way.

### 198 **Procrustes fit and outlier detection**

199 The first step of shape analysis in GM consists in extracting shape coordinates from raw data obtained at the  
200 digitization step. The standard procedure in GM studies is the Generalized Procrustes Analysis (GPA).

201 The purpose of Procrustes procedures is to remove from the specimens all information that is not relevant for  
202 shape comparisons, including size. Specimens are firstly translated at the origin (“superimposed”) by  
203 subtracting the coordinates of its centroid from the corresponding (X or Y) coordinates of each landmark.  
204 Then, differences in size are removed by rescaling each specimen to the mean centroid size (CS) (CS is  
205 calculated as the square root of the summed squared distances of each landmark from the centroid). Differences  
206 in rotation are eliminated by rotating specimens, minimizing the summed squared distances between  
207 homologous landmarks (over all landmarks) between the shapes. MorphoJ performs a full Procrustes fit, which  
208 is a variant of the analysis that is more conservative and resistant to outliers of shape.

209 A few recent studies, focusing on flowers [58–60] or leaves [61], study asymmetry in plants by using geometric  
210 morphometrics, compared with those in animals [51]. Although this work will not study the asymmetry issue,  
211 it must be briefly considered. In Arabidopsis, the arrangement of organs along the stem (phyllotaxy) follows a  
212 predictable pattern, the Fibonacci series. Phyllotaxy orientation can be clockwise or counter-clockwise [62].  
213 There is no preferred orientation of Arabidopsis rosettes and in this study 20 were clockwise, whereas 21 were  
214 counter-clockwise. It is thus an example of antisymmetry, where (following Klingenberg’s [51] explanation)  
215 “most individuals are asymmetric, but differ in the directions of the asymmetries so that there is a mix of “left-  
216 sided” and “right-sided” individuals”. This creates a bimodal distribution that should be considered because  
217 clockwise and counter-clockwise rosettes are biological enantiomorphs and must not be directly superimposed  
218 by GPA. Opportunely, MorphoJ automatically performs reflections on every specimen when executing a GPA  
219 and therefore it is not a problem at this stage. However, care must be taken with different software.  
220 Alternatively, rosettes can be reflected using TPSDig2 to leave all clockwise or counter-clockwise rosettes  
221 prior to landmark digitization.

222 Although the full Procrustes fit performed by MorphoJ is considered to be more resistant to outliers of shape  
223 [44], there could still be specimens that divert from the rest to a great extent. The “Find Outliers” option in the  
224 “Preliminaries” menu provides an indication of how unusual an individual is relative to the others in the sample  
225 (using Mahalanobis distance in larger samples). The user can therefore consider subtracting this specimen from

226 the rest as an outlier. A GPA was run for each dataset (each comprising one of the DPIs and one digitization  
2 replicate) and outliers were evaluated in each of the 16 datasets, separately.

### 228 **Assessment of the tangent space approximation**

229 For a given M-dimensional structure with K landmarks (here,  $M = 2$  and  $K = 11$ ) an individual's shape can be  
230 visualized as a point in an  $M \times K$  multidimensional space (a hypersphere). After centering and rescaling, three  
231 dimensions are lost and shapes are said to be in a pre-shape space; they are not rotated yet. The distance in the  
232 hypersphere surface at which rotation differences between shapes are minimal, is called Procrustes distance  
233 (the conventional measure of a morphometric distance in geometric morphometrics [63]). Afterwards, a  
234 reference (average) shape is selected and all other shapes are rotated to minimize distances relative to it,  
235 generating a shape space and losing one more dimension (remaining  $2K-4$ ). Because distances over curved  
236 multidimensional spaces are non-Euclidean, conventional tools of statistical inference cannot be used.  
237 Fortunately, for most biological shapes a good approximation to Euclidean distances is possible, by projecting  
238 shape points to a tangent Euclidean space (for a visual explanation see [43]). This assumption should, however,  
239 be tested when analyzing new data. TPSSmall is used to determine whether the amount of variation in shape  
240 in a data set is small enough to perform statistical analyses in the linear tangent space approximate to Kendall's  
241 shape space which is non-linear. This task is performed by basically comparing the Procrustes distances  
242 obtained using both shape spaces. Since TPSSmall does not perform reflections, datasets analyzed with  
243 TPSDig2 were opened again and specimens reflected when necessary to leave all clockwise rosettes. Two data  
244 subsets were created for each DPI, one with Mock-inoculated plants and other with ORMV-infected plants.  
245 Next, the datasets were combined across DPIs using the "Append files" option of TPSUtil to create three main  
246 datasets (Mock, ORMV and ALL plants).

### 247 **Testing digitization error and variation between treatments using Procrustes ANOVA**

248 As mentioned before, two digitization instances were performed on each plant at each DPI, in order to evaluate  
249 digitization error. This procedure is important because digitization error should always account for far less  
250 variance in the subsequent analyses than specimens and treatments do [35]. The differences between the  
251 samples and particularly between the treatments are the ones worth investigating, not the human error in  
252 landmark placement. Purposely, datasets for each DPI were combined and subjected to a hierarchical analysis  
253 of variance (ANOVA). In MorphoJ this is a Procrustes ANOVA, with "Treatment" as an additional main  
254 effect, "ID" for the individuals and "Digitization" as the Error1 source (the last term is equivalent to the  
255 Residuals here, as only one source of error is being quantified). One Procrustes ANOVA was performed for  
256 each DPI, separately.

257 In Procrustes ANOVA, variance is partitioned by means of hierarchical sum of squares (SS) which implies  
258 that each effect is adjusted for effects that appear earlier in the hierarchy. This takes into account the nested

259 structure of the data and therefore allows the quantification of differences in Treatments and individuals  
260 (plants) regardless of Treatment. (This is an issue that is crucial if the design is unbalanced, that is, with unequal  
261 sample sizes, in part because hypothesis tests are more robust to the assumptions of normality and equal  
262 variance when the design is balanced. Although the design here is unbalanced (24 Mock and 17 ORMV plants),  
263 it is considered a minor problem for designs that are not extremely unbalanced and/or do not involve more than  
264 one factor [43,64]. It should, however, be taken into account when multiple factors are studied, requiring  
265 special calculations for obtaining the correct sum of squares. MorphoJ also recommends to use data that are as  
266 balanced as possible (see [43] for a discussion on the topic). The variance unexplained by any of these effects  
267 (Treatment and Individual) is digitization error and it is estimated using the differences between digitizations.  
268 Hence, total variance was decomposed into main (treatment) and random (ID and digitization) components  
269 and was expressed as a percentage of total variance for each DPI. Statistical significance is provided by  
270 Goodall's F-tests [65], for size and shape. The parametric Goodall's F-test assumes isotropic variation (the  
271 assumption that there is an equal amount of variation around each landmark), which is often violated in  
272 biological studies [66]. For many practical applications it is possible to use the approach based on Procrustes  
273 distances to assess the relative magnitudes of effects, but to make statistical inferences, the MANOVA  
274 approach is used [44]. For this reason, MorphoJ includes a multivariate test (Pillai's Trace) for shape.

## 275 **Ordination Methods and shape change visualization**

### 276 *PCA*

277 Once shape variables (the 22 Procrustes Coordinates) are extracted for all specimens at each DPI, it is a useful  
278 option to plot differences between individuals and treatments. However, patterns of variation and covariation  
279 between lots of variables are difficult to interpret and shape variables are not statistically independent [43].  
280 PCA is a technique that simplifies those patterns and therefore makes them easier to interpret. When a PCA is  
281 performed, the original, possibly correlated set of shape variables are mathematically transformed to create a  
282 new set of orthogonal and independent variables (principal components, PCs) that are a linear combination of  
283 the original variables. PCs do not covary, but carry all the original shape information. As each PC explains  
284 sequentially less shape variance, this approach is often used to restrict the analysis to the first few PCs that  
285 account for most of total variance [43]. However, some recent developments in the GM field [67] propose that  
286 PCA should be at least carefully interpreted, since the biological meaning of the PC axes are difficult to assess.  
287 Here, PCA will be used conservatively to discuss relative shape distances between individuals belonging to  
288 different groups, as advised by Howells [68]. It is also important to remember that PCA is useful for studying  
289 distances between individuals, not groups, and although a powerful descriptive tool, it does not involve any  
290 statistical test. Therefore, the relative separation of groups in a PCA plot does not allow one to draw  
291 conclusions about significant differences (or its absence).

292 **Visualization of shape changes**

293 A brief description of common GM visualization tools is needed in order to accurately interpret the results.  
294 After the GPA, every configuration in the sample is optimally aligned to the average configuration and nearly  
295 optimally aligned to every other configuration in the sample [69]. GPA has already removed differences  
296 attributable to size, position and orientation from configurations. All differences that remain are shape  
297 variation. Accordingly, shape differences are found using the relative displacements of the landmarks from  
298 one shape to another nearby in shape space [69].

299 A key concept to bear in mind is that it is fundamentally wrong to consider landmarks displacements in an  
300 isolated manner [43,69] (see example in [35]). This is because all the landmarks in the GPA jointly determine  
301 the alignment of each configuration in relation to the mean shape. Then, the variation in the position of each  
302 landmark after superimposition is relative to the positions of all other landmarks. Although a shift is shown at  
303 every landmark, these shifts are relative to all other landmarks. Lollipop and wireframe graphs are based on  
304 these assumptions (see the Results section).

305 Shape variation could be depicted by means of transformation grids, which are mathematically constructed  
306 following the thin-plate spline technique [43,57,69]. Briefly, landmarks of a starting shape are placed on a grid  
307 of an imaginary infinitely thin metal plate. Landmarks of a target configuration are placed on another grid of  
308 equal characteristics, and both metal sheets are superimposed. Each landmark in the starting shape (e.g., mean  
309 shape) is linked to its homologous reach the target configuration, and the deformation caused in the spline  
310 is calculated finding the smoothest interpolating function that estimates energy changes in the spline between  
311 landmarks. Importantly, unlike lollipop or wireframe graphs, transformation grids distribute the change in  
312 landmark positions to the space between landmarks, were no objective information is available. Then, whereas  
313 a powerful descriptive tool, transformation grids must be carefully interpreted, especially regarding regions of  
314 the object that do not have landmarks nearly positioned [43,69]. More details and examples are given in the  
315 Results section.

316 **Discriminant Analysis**

317 DA is mathematically related to PCA. It finds the axes that optimize between-group differences relative to  
318 within group variation. It can be used as a classification tool [43]. It is here used for testing treatments by using  
319 tests for sample mean differences including an estimate of the accuracy of shape in predicting groups. The  
320 capability of DA to correctly assign specimens to treatments was assessed along the experiment using the  
321 averaged datasets for each DPI. In MorphoJ, Discriminant Function Analysis was requested selecting  
322 “Treatment” as the classification criterion. By default, DA in MorphoJ performs a parametric Hotelling’s T-  
323 square test (multivariate equivalent of the Student’s t-test). Here requested permutations tests were also

performed for the Procrustes and Mahalanobis distances with 1000 random runs. Procrustes and Mahalanobis distances show how far shapes from one group are from the mean of the other group.

### **Allometric patterns and size correction**

The covariation between a size variable and shape variables is called allometry. Isometry, by contrast, is the condition where size and shape are independent of each other and usually serves as the null hypothesis. These concepts are rooted in the Gould-Mosimann school of allometry that conceptually separates size and shape [70]. Although size had been removed from forms after GPA, thus leaving shape differences free of it, a consistent trend in change of shape with size may be possible. Allometry can be statistically tested by tests of multivariate regression.

When groups are present, a single regression line through all groups cannot be fit to test allometry because lines could have group-specific slopes or intercepts [35]. To test whether an allometric component is present in each group, separate regressions were performed for each treatment and DPI with Procrustes Coordinates and ln(CS) as dependent and independent variables, respectively. Permutation tests were requested with 10.000 runs.

When at least one group has regression slopes different from zero several tests could be done in order to control for size and repeat analyses to assess whether differences in shape are actually the result of size variation only [34,35,43,70]. A MANCOVA (with treatments as groups, shape coordinates as dependent variables and ln(CS) as the independent variable) was run from 3 to 8 DPI. The MANCOVA is first run allowing each group to have its own slope. Next, the regression analysis is run again but this time it fits a multivariate analysis of covariance with the slopes constrained to be the same in each group (i. e., parallel). Although the percentage of variance explained (%SS) for the regression of the first model is always higher than the second one (constrained by the premise to keep parallel the slopes), if differences are small the allometric trajectories could be considered to be parallel. TPSRegr (v.1.41) provides multivariate and permutation tests for the assessment of that difference [46]. Afterwards, the MANCOVA model tests if slopes are parallel but separate or if they are coincident (same Y-intercept), and a common regression slope including individuals from both treatments could be fit. This allows to correct for size and to test, for example, if DAs are improved after removing the "size-effect" [35].

### **Phenotypic Trajectory Analyses (PTA) and morphospace occupation patterns**

Whereas the comparison of allometric vectors allows to test whether shape change is altered at definite DPIs during ORMV infection, a more complete view of ontogenetic alterations needs to measure phenotypic evolution across multiple levels. It allows ontogenetic patterns to be characterized as phenotypic trajectories through the morphospace, rather than phenotypic vectors. The method proposed by Adams and Collyer [71] *"may also be used for determining how allometric or ontogenetic growth trajectories differ, or for quantifying*



357 *patterns in other data that form a time-sequence*” [71]. Briefly, phenotypic trajectories have three attributes:  
358 size, direction and shape.  
359 Trajectory size (*MD*) quantifies the path length of the phenotypic trajectory expressed by a particular group  
360 across levels. This represents the magnitude of phenotypic change displayed by that group. If trajectories of  
361 two or more groups compared over comparable time periods differ in trajectory size then it indicates  
362 differences in rates of morphological change.  
363 Trajectory direction ( $\theta$ ) is a multivariate angle that describes the general orientation of phenotypic evolution  
364 in the multivariate trait space. Statistical comparisons of trajectory direction can be used to provide an  
365 assessment of patterns of convergence, divergence, and parallelism.  
366 Trajectory shape ( $D_{Shape}$ ) describes the shape of the path of phenotypic evolution through the multivariate trait  
367 space. This information is useful because it indicates whether there are differences in how each group occupies  
368 the morphospace through the time period.  
369 PTA analysis starts from the PCs for all specimens at all DPIs. They were obtained from the “Combined dataset  
370 3-12 DPI, averaged by ID DPI” of the Supplementary file ORMV.morphoj. The R script developed by Adams  
371 and Collyer [71] was run in RStudio [72,73].  
372 However, as has been pointed out by Ciampaglio *et al.* [74], no one method of disparity measurement is  
373 sufficient for all purposes. The use of a combination of techniques should allow a clearer picture of disparity to  
374 emerge. With this aim, another available approach to compare shape trajectories through multivariate  
375 morphospace was used. Originally developed to study unequal morphological diversification in a clade of  
376 South American fishes [75], this approach is useful because allows us to investigate whether a group “explores”  
377 different amount of morphospace than others, additionally to possible differences in magnitude of phenotypic  
378 evolution. Moreover, density parameters (*D*) could be calculated to determine whether the amount of  
379 morphological change is more or less constrained in the morphospace.  
380 The method was adapted to the present study. As there is not a phylomorphospace and both treatments lack a  
381 “common ancestor” but each plant follows its own independent ontogenetic path, nodes and branches do not  
382 exist. Rather, each plant possesses its own trajectory without points in common. Therefore, morphological  
383 trajectories were calculated for all plants taking these considerations into account. For this purpose, the  
384 “Combined dataset 3-12 DPI, averaged by ID DPI” of the Supplementary file ORMV.morphoj was subdivided  
385 by ID. Forty new datasets (Mock- and ORMV-inoculated plants from the same previously performed  
386 Procrustes fit) were obtained and Procrustes Coordinates and eigenvalues from the seven PCs obtained were  
387 exported to an Excel spreadsheet.

## 388 **Statistical analyses**

389 Except otherwise stated, shape analyses were performed using MorphoJ [44] and the TPS series [46], as  
390 described in the main text. Paired Hotelling's tests for intra-treatment inter-DPI shape change analyses and  
391 Mann-Whitney tests for rosette growth analysis were executed in PAST [45]. PTAs based on Adams and  
392 Collyer [71] were run in R [72]. Excel 2010 was used for Holm's-Bonferroni sequential test for multiple  
393 comparisons [76,77] and hyperellipses calculations using Real Statistics for Excel 2010 (ver. 4.14) [78].

## 395 **Results**

396 Morphometrics aims at analyzing the variation and covariation of the size and shape of objects, defining  
397 altogether their form. Shape and form might be confusing words, used as synonyms in many languages [13].  
398 Hereafter, it will be followed the GM definition of shape in the sense of [20] that it is "all the geometric  
399 information that remains when location, scale and rotational effects are filtered out from an object".

### 400 **Landmark configuration, Procrustes fit and outliers detection**

401 Figure 1A shows an 11-landmark configuration for the Arabidopsis rosette. Plants were inoculated in their  
402 third true leaf (24 plants were mock-inoculated and 17 were ORMV-infected) and images were acquired  
403 starting from three days post-inoculation (DPI) to 12 DPI (see Materials and Methods).

404 After executing a full Procrustes fit of each dataset, they were inspected for the presence of outliers. The shape  
405 of one Mock-inoculated plant (M2) diverted the most from the rest in 11 out of 16 datasets and was excluded  
406 from all datasets for successive analyses. Thus, 23 Mock-inoculated and 17 ORMV-infected plants were used  
407 for the subsequent morphometric analyses.

408 Afterwards, datasets were combined and the "Combined dataset 3-12 DPI" was created with 640 observations  
409 included following a common GPA. Then, a wireframe was created that connects consecutive landmarks. This  
410 tool aids visualization, as will be explained later. Next, the "Combined dataset 3-12 DPI" was subdivided by  
411 DPI. This creates one dataset for each DPI; each one with the two digitization outputs for each plant.

### 412 **Assessment of the tangent (Euclidean) space approximation**

413 By using the combined datasets for Mock-inoculated, ORMV-infected and ALL plants (see Materials and  
414 Methods), TPSSmall (v.1.33) was run to compare statistics for distance to reference shape both in Tangent  
415 (Euclidean) and Procrustes (Kendall's) shape space for both treatments separately and for all plants together  
416 (Supplementary Table 1). The results showed that maximum Procrustes distances from mean (reference) shape  
417 were 0.371 (ORMV), 0.405 (Mock) and 0.400 (ALL). Mean Procrustes distances from mean (reference) shape  
418 were 0.168 (ORMV), 0.186 (Mock) and 0.184 (ALL). This indicates a closer arrangement of ORMV shapes  
419 in shape space relative to Mock-inoculated plants. Tangent and Procrustes distances were highly similar  
420 (Supplementary Table 1) and regressions through the origin for distance in tangent space, Y, regressed onto  
421 Procrustes distance, X, showed slopes  $> 0.98$  and correlations  $> 0.9999$  for all groups (Supplementary Table 1

and Supplementary Figure 1). These results are in line with several similar analysis performed onto a variety of biological forms [35,79–81]. Thus, the projections of shapes in Kendall’s shape space onto a tangent Euclidean shape space are good approximations for the studied shapes.

### **Testing digitization error and variation between treatments using Procrustes ANOVA**

Eight separate hierarchical (Procrustes) ANOVAs were performed to assess digitization error at each DPI. The analysis was executed simultaneously for both size and shape. Results are shown in Supplementary Table 2.

Explained variance (as a % SS) for which individuals accounted was 17.93 to 99.95 for size and 61.00 to 96.74 for shape over all DPIs. By contrast, explained SS (%) for digitization error ranged from 0.01 to 0.12 for size and 0.40 to 1.15 for shape and were almost always two orders of magnitude smaller than individual SS. Thus, digitization error was negligible throughout the digitization process. Furthermore, the results shown in Supplementary Table 2 revealed that for size, the Individual (ID) effect was highly significant at each DPI as evidenced by Goodall’s F-test ( $p < 0.0001$ ). Treatment effect was insignificant from 3 to 5 DPI but starting from 6 DPI the virus affected plant size ( $0.0001 < p < 0.03$ ).

For shape, similar results were obtained. Indeed, the Individual effect was also highly significant at each DPI as evidenced by Goodall’s F-test ( $p < 0.0001$ ) and MANOVA (standing for Multivariate Analysis of Variance) results ( $p < 0.0001$ ). Treatment impacted earlier in shape than size, as differences in shape were evident as soon as 5 DPI ( $p = 0.0008$ , multivariate test). The infection also had an increasingly proportionally higher impact along the experiment, to reach 82.35 and 38.29 of the explained % SS at the end of the experiment (12 DPI) for size and shape, respectively. Accordingly, ORMV induced a relative growth stagnation that was progressively more accentuated along the experiment (Figure 2).

### **Ordination Methods and shape change visualization**

#### **PCA**

Firstly, PCA was used to assess error measurement (previously quantified by Procrustes ANOVA, Supplementary Table 2). A covariance matrix was created for the “Combined dataset 3-12 DPI” and then a PCA was performed. Scatterplots were generated for the first four PCs, which together account for 87.2 % of total variance (Figure 3). The proximity of equally colored points indicates a small digitization error.

As digitization error explained a negligible percentage of variance, digitizations were averaged within specimens for each DPI. From the “Combined dataset 3-12 DPI” it was created the “Combined dataset 3-12 DPI, averaged by ID DPI” dataset, which contains all 320 averaged observations. The averaged data were used to find the directions of maximal variance between individuals by requesting a PCA. Three types of graphs were obtained: PC shape changes (a diagram showing the shape changes associated with the PCs); Eigenvalues

454 (histogram showing the percentages of total variance for which the PCs account) and PC scores (scatterplot of  
2 PC scores) (Supplementary file ORMV.morphoJ).  
455  
4 PC1 and the first four PCs accounted for 64.2 % and 87.4 % of total variance, respectively. PC Scatterplots  
456 show specimen distribution of along the axes of maximum variance (Figure 4A, B). Dots corresponding to  
457 early (3-6 DPI) and later (7-12 DPI) stages were colored in a lighter or darker tone, respectively, to aid  
458 visualization. The results showed that PC1 is likely an axis related to development (change in shape related  
459 with age), because clearly separated early (mostly negative values) from late (positive values) stages of the  
460 experiment (Figure 4A). Moreover, at later stages ORMV-infected plants had fewer positive scores in this axis;  
461 which suggests that infected plants retained a more juvenile (paedomorphic) shape. Positive extremes of PC2-  
462 4 are related to ORMV shapes.  
463  
464 Also, by using the shape coordinates of the 320 averaged observations, it was next investigated whether plants  
465 changed their shapes between successive DPIs, within treatments. Intra-treatment paired comparisons of shape  
466 are possible using a paired Hotelling's test (a multivariate analog of the paired t-test). A strong effect of time  
467 on shape was evident from the start of the experiment and differences were extremely statistically significant  
468 for Mock plants (Supplementary Table 3). From this point, GM visualization tools are used to better understand  
469 what these relative positions on scatterplots mean respect to shape differences.

### 470 *Visualization of shape changes*

471 Wireframe graphs (Figure 4C-F) can be requested for each PC of interest from the "PC shape changes" tab by  
472 right-clicking onto the displayed image and changing the type of graph. Wireframe graphs connect the  
473 landmarks with straight lines for the starting and target shapes by using a previously created Arabidopsis  
474 wireframe, thus showing the relative displacements of landmarks from a mean shape. Negative values of PC1  
475 mostly correspond to juvenile (and infected) shapes; positive values of PC1 belong to healthy controls and  
476 adults. Hence, by depicting the -PC1 component, target shapes are given negative values (Figure 4C). The -  
477 PC1 explains the relative shortening of leaves #11 (the space limited by landmarks 4, 9 and 11) and #12  
478 (landmarks 5, 10 and 11). This makes sense, since younger plants have yet to develop these relatively new  
479 leaves. Petioles of leaves #10, #11 and #12 are particularly relatively shortened. Relative to these shortenings,  
480 older leaves (#8 and #9) are longer but, interestingly, only its laminae, since its petioles are not relatively  
481 elongated. Taken together, PC1 reveals that ORMV impaired the elongation of newer leaves to their normal  
482 extent. PC2 (Figure 4D) associates with relative radial displacements of leaves; tips of leaves #8 and #9  
483 (landmarks 1 and 2) come close together, lowering the typical angle between successive leaves from near  
484 137.5° to close to 90°. These relative displacements determine that leaves #9 and #10 form an exaggerated  
485 angle of near 180°. PC3 (Figure 4E) is also mostly associated with radial changes in the infected rosette: leaf  
486 #10 is relatively displaced towards leaf #8 and the main effect is, again, the increase of the angle between  
487  
488  
489  
490  
491  
492  
493  
494  
495  
496  
497  
498  
499  
500  
501  
502  
503  
504  
505  
506  
507  
508  
509  
510  
511  
512  
513  
514  
515  
516  
517  
518  
519  
520  
521  
522  
523  
524  
525  
526  
527  
528  
529  
530  
531  
532  
533  
534  
535  
536  
537  
538  
539  
540  
541  
542  
543  
544  
545  
546  
547  
548  
549  
550  
551  
552  
553  
554  
555  
556  
557  
558  
559  
560  
561  
562  
563  
564  
565

487 leaves #9 and #10 to near 180°. PC4 (Figure 4F) explains less proportion of total variance (4.5%) and is mostly  
488 related to the relative displacement of the lamina of leaf #11 towards leaf #9 almost without altering its petiole,  
489 which functions as a hinge. Leaves #9 and #10 are, as a combination of the effects depicted by PC2 and PC3,  
490 both relatively displaced towards leaf #8. Altogether, the wireframe visualization of the first four PCs (which  
491 account for more than 87% of total variance) shows that ORMV induces the relative shortening of laminae and  
492 (especially) petioles of newest leaves. This shortening is related to a paedomorphic shape. Furthermore, this  
493 analysis also demonstrates that ORMV provokes the relative displacement of leaves #9 and #10 towards leaf  
494 #8.

495 Displacement vectors (called “lollipop graphs” in MorphoJ) are arrows drawn between a landmark in a  
496 starting shape and the same landmark in a target shape. The dot in the lollipop represents the starting position  
497 and the vector is represented by a line departing from it (but in some software the inverse convention is  
498 followed, i. e., PAST). Although these visualization are being displaced in the GM literature in favor of more  
499 advanced tools [69], here it is presented the case for -PC1, showing the relative displacements of landmarks  
500 (Figure 4G). It can be directly compared with Figure 4C.

501 Finally, Figure 4H-I show exemplified transformation grids for -PC1. Figure 4H depicts the starting (mean)  
502 shape, whereas Figure 4I shows the transformed grid for -PC1. The compression of the grid in the central zone  
503 is the result of the relative displacement of the space between landmarks 3, 8 and 11 (leaf #10), 4, 9 and 11  
504 (leaf #11) and 5, 10 and 11 (leaf #12) towards the center of the rosette. In addition, grid stretching is detected  
505 around landmarks 1 and 2 and reveals the relative expansion of laminae of leaves #8 and #9, since its petioles  
506 remain relatively immobile, landmarks 6 and 7). As stated above, visualization with these grids should be  
507 cautiously interpreted since the interpolation function deforms the grid between places where no landmark is  
508 placed (and no information about even the existence of tissue is guaranteed). Therefore, such visualizations  
509 need to be interpreted cautiously in regions that are relatively far from landmarks [69]. To assess these changes  
510 in more detail, PCA analyses were performed for each DPI. The “Combined dataset 3-12 DPI, averaged by ID  
511 DPI” was subdivided by DPI performing a common Procrustes fit, thus creating eight new datasets (DPIs) (raw  
512 data in Supplementary file ORMV.morphoJ). Covariance matrices were generated and a PCA performed for  
513 each DPI dataset. PC1 and the first four PCs accounted for 27 to 43% and 78 to 84% of total variance,  
514 respectively. PCs beyond PC4 accounted for 5 % or less of variation each. Shape change visualization showed  
515 that PC1 gradually separated specimens belonging to different treatments. Mock-inoculated plants were  
516 progressively more aligned with positive PC1 values. PC2 was more generally related to ORMV-infected  
517 plants in its positive values. Relative shortening of younger leaves and petioles, and relative displacement of  
518 leaves towards leaf #8 were progressively more accentuated (Supplementary Figure 2).

### 519 *Discriminant Analysis*

So far, distances between individuals were addressed with the aid of PCA. Subsequently a Discriminant Analysis (DA) was performed to test whether differences between treatments are detectable at each DPI (Table 1). At 5 DPI the three tests detected shape differences between treatments ( $0.001 < p < 0.005$ ). From 6 DPI and beyond, p-values were extremely significant ( $p < 0.0001$ ). These results coincide with those obtained by Procrustes ANOVA of shape (Supplementary Table 2). DA maximizes group separation for plotting their differences and predicting group affiliation (classification). The classification of a given specimen (through the discriminant axis) is done using functions that were calculated on samples that included that same specimen (resubstituting rate of assignment). Then, a degree of over-fitting is unavoidable and leads to an overestimate of the effectiveness of the DA. To overcome this problem, one can use a cross-validation or jackknife procedure [35,43]. Jackknife procedure leaves one specimen at a time not used for constructing the Discriminant function and then tests the rate of correct specimen assignment. Only jackknife cross-validated classification tables provide reliable information on groups. Figure 5 displays DA results in group assignment for 3, 7 and 12 DPI and Supplementary Table 4 details these results for all DPIs. As expected, resubstitution rates of assignment (Figure 5A, D, G) were higher than jackknifed counterparts (Figure 5B, E, H) but jackknifed reached high levels of accuracy ( $\geq 90\%$ ) from 6 DPI and later (Supplementary Table 4). To test whether this level of accuracy was adequate, these results were compared with classification/misclassification tables completed by human observers. The entire image dataset of 7 DPI was given to three expert researchers working with Arabidopsis (one of the authors (S. Asurmendi) and two other researchers from another Institution). They did not know which plants were mock-inoculated or ORMV-infected, except for one Mock-inoculated and one ORMV-infected plant that were given as phenotypic references. These two reference plants were excluded from the dataset for subsequent human classification. The researchers classified the 38 remnant plants (Supplementary Table 4). Human accuracy ranged from 55 to 72.5%, with an average of 64.2%. Therefore, DA outperformed expert human eye by 30% at 7 DPI and yielded higher classification rates from 5 DPI.

Wireframe graphs for 3, 7 and 12 DPI (Figure 5C, F, I) show the difference from Mock to ORMV group. The difference was subtle at 3 DPI, if there were any (Figure 5C), consistently with nonsignificant differences found by DA at this stage. At 7 DPI (Figure 5F), the relative shortening of leaf #11 (landmarks 4, 9 and 11) and the relative increase in the angle between leaves #9 and #10 were evident. These tendencies persisted at 12 DPI (Figure 5I). At this stage, petioles of leaves #11 and #12 were strongly relatively shortened. These results resembled those obtained in Figure 4C-F and approximately summarize shape changes explained by the first four PCs. This indicated that these shape differences not only separated juveniles from adults but also are hallmarks of shape change induced by ORMV. These results are interesting because discriminant axes not necessarily resemble PCA axes [43].

### Allometric patterns and size correction

553 As ORMV induced not only changes in shape, but also in size (Supplementary Table 2), it is worth  
2  
554 investigating whether shape differences between treatments (within a given DPI) are associated with size  
4  
555 differences. In principle, group differences could arise if individuals of one group are different in shape because  
6  
556 they grew faster than those from the other group and reached earlier a more advanced developmental stage.  
8  
557 Allometry analyses were performed with individual datasets (each corresponding to one separate treatment for  
10  
558 each DPI) from the first Digitization (as proven earlier (Figure 3 and Supplementary Table 2), differences  
11  
559 between digitization instances were negligible).  
13  
560 Figure 6A and Supplementary Table 5 show groups with statistically significant allometry and predicted SS  
15  
561 from regressions (which correspond to allometric variation of shape). Allometry accounted for moderate to  
17  
562 high proportion of the total shape variation, since SS reached values of 36% at 6 DPI (Mock). ORMV induced  
18  
563 a reduction in the allometric component of shape variation as evidenced by lower predicted SSs throughout  
20  
564 the experiment and nonsignificant values of allometry for all except 4 and 5 DPI. For both treatments and  
22  
565 particularly for healthy controls, a bell-shaped curve was detected. A maximum of allometry was detected at  
24  
566 6 DPI for Mock plants but a day before for ORMV. Differences between treatments started at 5 DPI, when  
26  
567 allometry accounted for 32% and 20% of predicted SS for Mock and ORMV, respectively. This analysis shows  
28  
568 that shape variation is much less driven by size heterogeneity (at a given DPI) in ORMV plants. On the other  
29  
569 hand, for Mock plants this situation (isometry) occurs at later stages of development (10-12 DPI).  
31  
570 Allometry was detected from 3 to 8 DPI. For this reason, TPSRegr (v. 1.41) was used firstly to determine  
33  
571 whether treatment-specific slopes were parallel at each DPI (3 to 8) (Supplementary Table 5). This  
35  
572 phenomenon only occurred 3 and 4 DPI ( $p > 0.05$ , non statistically significant slope differences). As slopes were  
37  
573 found to be parallel, it is possible to test whether they are separate parallel slopes or coincident (same Y-  
39  
574 intercept). TPSRegr tests demonstrated that slopes were coincident ( $p > 0.05$ ). Then, size-corrections could only  
40  
575 be done for 3 and 4 DPI, since from 5 to 8 DPI slopes were different ( $p < 0.05$ ) and groups follow its own  
42  
576 allometric pattern and for 10 and 12 DPI there is isometry and size do not correlate with shape variation. Size-  
44  
577 correction was done for 3 and 4 DPI separately in MorphoJ, using all 40 plants. Shape variables were regressed  
46  
578 onto  $\ln(\text{CS})$  for each dataset, by pooling regressions within subgroups (treatments) and permutation tests with  
48  
579 10.000 runs were requested. Residuals from the analyses contain the size-free information about shape only  
50  
580 and can be used to repeat DAs to test for improved accuracy of discrimination [70]. Group separation was not  
51  
581 improved (Figure 6B-E). This is somehow expected since at this stage of the viral infection differences in size  
53  
582 or shape are undetectable (Supplementary Table 2, Table 1 and Figure 5). This test and the large overlap  
55  
583 between populations in the scatterplot of regression scores on size (Figure 6F, G) suggest that the effect of size  
57  
584 on shape is very similar for both treatments and DPIs. Bigger rosettes have further distal displacements of  
59  
60  
61  
62  
63  
64  
65

585 leaves #10, 11 and 12 relative to older leaves (#8 and 9) and elongated petioles (Figure 6H, I), thus reflecting  
586 the differential internal growth of the rosette. Bigger, more mature rosettes have more developed newest leaves.

### 587 **Phenotypic Trajectory Analyses (PTA) and morphospace occupation patterns**

588 PTA approach (with 1,000 residual randomization permutations) revealed significant differences in the  
589 magnitude of phenotypic evolution between the two treatments ( $MD_{\text{Mock,ORMV}} = 0.100$ ,  $P_{\text{size}} = 0.003$ ). This  
590 implies that ORMV-infected plants experienced a lower rate of ontogenetic phenotypic evolution compared to  
591 controls. Overall direction of ontogenetic changes were also statistically significantly different ( $\theta_{\text{Mock,ORMV}} =$   
592  $18.34^\circ$ ,  $P_\theta = 0.001$ ). Finally, shape assessment analysis showed differences between treatments regarding  
593 trajectories over time ( $D_{\text{ShapeMock, ORMV}} = 0.367$ ,  $P_{\text{Shape}} = 0.001$ ) (Table 2). Accordingly, when phenotypic  
594 trajectories were plotted over time through a projection of the first two generated PCs on a plane (Figure 7), it  
595 was found that Mock and ORMV plants follow different trajectories across the morphospace. Beyond 6 DPI,  
596 ORMV induced a relative stasis along PC1 (major morphological axis).

597 Regarding differences in morphospace occupation patterns, the morphometric change experienced by a plant  
598 throughout ontogeny equals the Euclidean distance (D) between successive points in a morphospace that  
599 represents its shape at each DPI. As PCs from a PCA carry all the morphological information extracted from  
600 the Procrustes Coordinates, distances are simultaneously calculated over all the PCs by using the Pythagorean  
601 Theorem. These distances are designated as morphometric path lengths ( $\Sigma D = \text{MPL}$ ) (sensu [75]). Mock-  
602 inoculated plants traveled on average more distance through morphospace than infected plants ( $\text{MPL}_{\text{Mock}} =$   
603  $0.6956$  vs.  $\text{MPL}_{\text{ORMV}} = 0.5963$ ,  $p = 0.00025$ , Mann-Whitney test). Other measures are traditionally used to  
604 detect changes in morphospace occupation patterns and the amount of the difference between character states  
605 among specimens in morphospace [74], e.g. sum of variances ( $\Sigma \text{Var}$ ). Control plants had higher  $\Sigma \text{Var}$  values  
606 than infected plants ( $\Sigma \text{Var}_{\text{Mock}} = 0.0350$  vs.  $\Sigma \text{Var}_{\text{ORMV}} = 0.0230$ ,  $p = 2.52 \times 10^{-6}$ , Mann-Whitney test). This  
607 result suggested a higher increase in shape change in controls [74]. Morphospace density occupation measures  
608 could be obtained taking into account not only MPLs but variances of the PCs across the experiment. If a group  
609 folded an equivalent amount of morphometric change into a much smaller region of morphospace than another,  
610 then it will have a higher density [75]. Morphometric path density (D) could be calculated as  $D_1 = \text{MPL}/\Sigma \text{Var}$ .  
611 ORMV-infected plants are more densely restricted in morphospace ( $D_{1(\text{Mock})} = 20.21$  vs.  $D_{1(\text{ORMV})} = 26.93$ ,  $p =$   
612  $2.89 \times 10^{-6}$ , Mann-Whitney test) (Table 2).

613 An alternative measure of density ( $D_2 = \text{MPL}/V$ ) considers the volume (V) that the group occupies in  
614 morphospace. Several volumetric measures are possible [74]. This study considered the volume of a 95%  
615 confidence hyperellipse.  $D_2$  was obtained by calculating the square root of the product of the eigenvalues of  
616 the PCs and comparing them with expected values for a  $X^2$  distribution at  $\alpha = 0.05$ . Mock-inoculated plants  
617 have hyperellipses of higher volume on average ( $\text{Hyperellipse}_{(\text{IC95\%})\text{Mock}} = 0.0129$  vs.  $\text{Hyperellipse}_{(\text{IC95\%})\text{ORMV}}$



618 = 0.0073), although the differences were not statistically significant ( $p = 0.11888$ , Mann-Whitney test).  
619 Similarly, density measures based on hyperellipses calculations were not statistically significantly different  
620 ( $D_{2(\text{Mock})} = 111.47$  vs.  $D_{2(\text{ORMV})} = 146.34$ ,  $p = 0.25051$ , Mann-Whitney test), although ORMV-infected plants  
621 had a higher average density. These differences could be because hypervolume calculations can produce  
622 extremely small and variable values. The hypervolume is calculated by taking the product of univariate  
623 variances and thus any axis or axes with negligible variance will produce a hypervolume value close to zero.  
624 Moreover, all multiplied variances are given the same weight and, consequently, PC axes representing a  
625 minimal percentage of the total variance could distort conclusions obtained with more informative axes. Thus,  
626 hypervolume can be very sensitive to variation in a single character. To avoid this, one must select only the  
627 axes with significant variances to represent the disparity among points in morphospace [74]. Therefore, the  
628 analysis was repeated including only the first three PCs, which accounted for more than 95% of variance. The  
629 results were similar to those previously found for all the parameters, but with significantly different  
630 hyperellipse volumes ( $\text{Hyperellipse}_{(\text{IC}95\%)\text{Mock}} = 0.022$  vs.  $\text{Hyperellipse}_{(\text{IC}95\%)\text{ORMV}} = 0.014$ ,  $p = 0.0052597$ ,  
631 Mann-Whitney test) and  $D_2$  parameters ( $D_{2(\text{Mock})} = 32.97$  vs.  $D_{2(\text{ORMV})} = 41.87$ ,  $p = 0.040172$ , Mann-Whitney  
632 test) (Table 2).

633 Altogether, PTA and morphospace occupation patterns showed that Mock-inoculated and ORMV-infected  
634 plants follow separate paths through morphospace. They differ in length, direction and shape (Figure 7). They  
635 also explore distinct regions of morphospace in a disparate quantity. Control plants experience more  
636 diversification of shape, as evidenced by the comparative length of trajectories ( $MD$  and  $MPL$ ), have a higher  
637 amount of difference between shape states in morphospace ( $\sum\text{Var}$ ) throughout the experiment and explore  
638 ampler regions of morphospace ( $D_1$ ,  $D_2$ ) (Table 2). Thus, ORMV infection not only alters the direction of  
639 ontogenetic shape development, but also diminishes shape change.

### 640 **Comparison with TuMV infections**

641 One goal of applying the GM approach to Arabidopsis studies is to make more objective and repeatable  
642 phenotypic comparisons. To this end, the same experimental setup was applied to study viral infections of *A.*  
643 *thaliana* with TuMV, an ssRNA+ virus unrelated to ORMV [82]. The experiment spanned from 4 to 10 DPI.  
644 The time point at 12 DPI was discarded because excessive curling of some leaves owing to TuMV infection  
645 impaired the correct assignment of landmarks (Supplementary file TuMV 1st.morphoj). Individual datasets  
646 were created for each DPI and Procrustes Coordinates were extracted. A combined dataset was created and  
647 PCA carried on. After the exclusion of outliers, 27 Mock and 14 TuMV-inoculated plants remained. PCA  
648 revealed PC1 accounted for 49.2% of total variance (much less than in the ORMV experiment) and PC1 plus  
649 PC2 accounted for 69.3% of total variance. Again, PC1 mostly separates juveniles from adult rosettes and  
650 negative values related predominantly to infected plants, which retained a more immature phenotype (Figure

8A). This result was supported by the associated wireframe graph, which depicts a relative shortening of leaves #11 and #12, similarly to ORMV-infected plants (Figure 4C). PC2 was strongly positively related to infected plants and, similarly to the ORMV case (Figure 4D), reflected the widening of the angle between leaves #9 and #10. PCs 3 and 4 (Figure 8B-C) accounted for 17.7% of total variance and were mainly negatively related to TuMV infection. Discriminant Analysis (Figure 8D-E) showed that, like with ORMV, group means were statistically significantly different from 5 DPI. Wireframe graphs also evidenced a strong relative shortening of the petioles, like in ORMV infections (Figure 5F, I). This indicates that more compact rosettes are a common outcome of these viral infections. Discriminant power was slightly higher for almost all DPIs in the case of TuMV (Supplementary Table 4, Supplementary Table 6). Moreover, Procrustes Distances were higher for every DPI in the case of TuMV, which induced a Procrustes separation at 8 DPI that only matched at 12 DPI with ORMV-infected plants (Table 1, Supplementary Table 6). These results suggest that TuMV is a more severe virus in Arabidopsis than ORMV, since it induces a more pronounced departure from Mock mean shape. PTA supported this evidence, as evidenced by a subset of 4-10 DPI datasets selected to compare ORMV with TuMV infections (Figure 9A, B, Table 2). Whereas the trajectory size difference in TuMV-infected plants ( $MD_{\text{Mock, TuMV}}$ ) was similar to that obtained in ORMV-infected plants, the multivariate angle ( $\theta_{\text{Mock, TuMV}}$ ) that separates infected (TuMV) from healthy trajectories more than doubled that of the experiment with ORMV. Shape differences ( $D_{\text{ShapeMock, TuMV}}$ ) between trajectories almost doubled. Similarly to ORMV infection, most of the other measures indicated a slower rate of shape change compared to Mock plants (Table 2). To visualize and compare shape changes in the ORMV and the TuMV experiments, transformation grids with Jacobian expansion factors and lollipops were performed in PAST for 10 DPI plants (Figure 9C-F). Both viruses induced relative contraction of the rosette around leaf #11 (the most affected) but TuMV induced more severe deformations. To confirm these results and to test reproducibility, we carried out an independent experiment of TuMV infection (Supplementary file TuMV 2nd.morphoj). PTA analyses were ran and trajectory attributes compared (Table 2). The results were similar to those of first TuMV experiment. Altogether, these results indicated that both TuMV and ORMV induced relative developmental arrest as well as shape change. However, ORMV triggers symptoms that are mainly driven by developmental arrest, whereas TuMV also promotes a higher shape change that impacts more strongly on the overall shape.

## Discussion

Here, several GM tools were applied to assess morphological changes induced by viral infections in Arabidopsis. The GM analysis is a powerful approach owing to its statistical toolbox and its appealing visual analysis of shape change. By conceptually separating size and shape, both factors that determine form could be separately analyzed. Thus, the effect of ORMV infection was detected earlier on shape than in size (Table

1, Supplementary Table 2 and Figure 2). GM analysis greatly outperformed diagnosis when compared against expert human eye (Supplementary Table 4). The effect of time on shape was more pronounced than that of treatment, since the former was detected earlier (Supplementary Table 2 and Supplementary Table 3). This was particularly the case for control rosettes, indicating that normal rosette development is not a scaling up of previous shapes, but a relative displacement of newly developed structures. This process is somewhat impaired by ORMV, which induced the retention of a more juvenile-like phenotype (Figure 4). Normal allometric growth comprised a lengthening of petioles and laminae of new leaves (#11 and 12) relative to older ones (Figure 6H-I). This process was reversed by ORMV, which also distorted the normal angle of approximately 137.5° between successive leaves. As a result, leaves #9 and 10 were relatively bent towards leaves #8 and 11, which in turn came close together and bent towards the inoculated leaf (#3) that is middle way between them (Figure 5F, I). TuMV provoked similar outcomes (Figure 8) but with an apparent stronger effect, not only regarding the distorted inter-leaves angle, but for the relative contraction of leaf #11 respect to all remaining leaves, including #12 (Figure 8E, Figure 9D, F). It is important to note here that we did not perform absolute individual angle or distances measurements. This kind of traditional morphometric measurements could also be manually taken by using TPSDig2 software and would be an addition to the parameters presented here, where the focus is only on geometric morphometric tools. However, the normal leaf phyllotactic pattern (the arrangement of organs in regular patterns around the stem of a plant) seems not to be changed by these viruses (personal observations, data not shown). Instead, the distortion of the angle determined by the tip of two successive leaves (with its vertex in the center of the plant) appears to arise from the relative outgrowth of the distal part of the lamina. Taking into account the source-to-sink nature of viral movement by phloem [39] and its radial structure [83] it could be hypothesized that virus or viral-induced signals are distributed through the rosette in such a way that they inhibit proximal systemic growth. Future work should test this hypothesis by comparing cell number or size in distal and proximal parts of systemic leaves or by assessing the effect that growth hormones and mutants have in these parameters. This kind of data-based hypothesis is an example of a desirable outcome of the application of GM tools [43] in particular and of phenotyping in general. In this particular study, the observance of the relative shortening of petioles or laminae, and the distorted inter-leaves angles could lead to further experiments to more precisely quantify these discrete phenotypes using also traditional morphometric measurements. These traditional measurements however should be carried on taking into account its intrinsic statistic limitations (see [43], Introduction). Both viruses diminished shape change, by constraining virus-infected rosettes to smaller regions of multivariate morphospace (Supplementary Table 1, Table 2 and Figures 7 and 9). Ontogeny (the development or course of development of an individual organism) is a genetically-based endogenous process that can be

716 altered by the environment [84]. Here, both viruses induced the departure of normal ontogenetic development.  
717 The consequences of this departure should be further analyzed by measuring relevant traits.  
718 An objective measurement unit of shape change (Procrustes distance) allowed us to compare ORMV- and  
719 TuMV- induced shape changes relative to the departure from healthy control shapes (Tables 1 and 2,  
720 Supplementary Tables 2 and 6 and Figure 9) and objectively rank symptoms severity. In addition, visualization  
721 tools aided us in identifying where to allocate the shape change differences in the rosette (Figure 5C, F, I,  
722 Figure 8D-E and Figure 9D, F). In sum, TuMV impacts more strongly on Arabidopsis rosette shape than  
723 ORMV.  
724 In this work, two experiments with TuMV were performed to investigate reproducibility. The second  
725 experiment was carried out with roughly half the specimens (Table 2). Whereas PTA parameters were very  
726 similar between experiments, p-values tend to show a lesser statistical power associated with the smaller  
727 sample (Table 2). This point out both to the robustness of the effect found (PTA parameters) and the need to  
728 have of a minimum sample size to statistically assess shape differences, an issue that will reasonably be of  
729 more concern when studying more subtle effects. Although sampling problems arising from scarcity of  
730 specimens is certainly not a problem in Arabidopsis studies, having a large number of plants could indeed pose  
731 a problem because of the limited room in expensive growth chambers that are needed to perform physiological  
732 experiments in a highly-controlled environment. Minimum sample size estimation is not trivial, because it may  
733 vary depending on the natural shape variation within the assessed population and the kind of scientific question  
734 being addressed [85]. Further work should investigate the effect of sample size onto statistical parameters,  
735 since this parameter affects shape estimates more than size [85].  
736 Trajectory and density parameters could be also used to compare developmental phenotypic plasticity (a term  
737 generally used to summarize how a given group responds to different environmental conditions by producing  
738 an array of phenotypes [86]). Multivariate reaction norms could be then obtained using shape variables, but  
739 also controlling for other variables (size, external factors) and weighting their interaction. This would enrich  
740 the description of phenotypes, whereas offering a solid basis for comparisons.  
741 As superior organisms, plants have complex shapes that experience complex changes throughout their life  
742 spans, particularly when exposed to severe stresses that modify the route of ongoing development. Thus, their  
743 complex phenotypes are difficult to encompass in all their extent by using only one technique, regardless of its  
744 descriptive or statistical power. This is important when evaluating the capabilities and limitations of the GM  
745 tools presented here. For example, we showed that ORMV significantly impacts rosette shape from and after  
746 5 DPI (Table 1 and Supplementary Table 2). Furthermore, the wireframes (Figure 5C, F, I) helped us to detect  
747 that some laminae and (almost all) petioles become relatively shorter under ORMV infection. However, no  
748 particular statistical statement could be done about these discrete phenotypic outcomes. Rather, if these

749 questions were to be specifically addressed, other measures (such as direct measures of petioles' length) should  
2 have been taken. GM analyses performed here pointed to overall shape (and size) changes. Visualization tools  
750 could serve as guides to further study the putative underlying mechanisms involved if required. Landmarks  
4 analyses come with the limitation of not being capable of extrapolate results to the regions between them  
751 without uncertainty. For this reason, the selection of a specific set of landmarks (covering the region of interest)  
6 must be well stated at the beginning of the experiment and be sound to study the problem of interest. As with  
752 any other technique, caution is needed when interpreting the results because of its limitations. Here, it was  
8 investigated the contribution of one type of measurement error, the digitization error, which arises from  
9 subjective, human error in landmark placement. Other sources of measurement error have not been investigated  
11 here, such as imaging error (corresponding to the camera) and specimen positioning. We limited our  
13 measurement error analysis to the error-prone manual placement of landmarks, but the other types of  
15 measurement errors are still worth considering. The analysis pipeline is similar and could be performed in  
17 MorphoJ or other dedicated software. Moreover, as all biological entities are 3D objects, its approximation to  
18 2D structures inevitably involves some degree of measurement error. This issue has been raised since the first  
20 time of Geometric Morphometrics studies [87], but has been somehow neglected until recently [88]. Cardini  
22 [88] investigated the two to three dimensional approximation, and found that shape estimates were quite  
24 different for highly three-dimensional structures (crania). In our study, we used a particularly flat rosette,  
26 generally considered well-suited for 2D approximations [11]. However, with the advancement and lowering  
28 costs of 3D imaging and analysis, further studies should benefit from assessing the two to three dimensional  
30 approximation over the structures under analysis [88].

33 After the genomic revolution, there is a need of objective, reproducible, and accurate assessments of plant  
35 morphology as a critical missing link to supporting phenomics [89]. In fact, the use of GM tools to analyze  
37 plant shape have already started, from a botanical, systematic, archaeological [32,33,35] and even experimental  
39 [58] point of view.

41 The use of GM allows the relativization of deviations from controls in a consistent, objective manner. GPA,  
43 which is at the core of this conceptual framework, allows us to compare shapes in Procrustes units of distance.  
45 The examples given in this work are necessarily limited, but other applications could be easily envisioned. As  
47 the choice of landmarks placement is arbitrary on a given structure, other experimental setups could place them  
49 differently to study different stages of growth or other anatomical regions of interest. Importantly, this  
51 technique is not a competitor, but a possible complementation of newly developed automated platforms for  
53 rosette segmentation. Now possible some platforms can identify the tip of leaves, the center of the rosette and  
55 the intersection between lamina and petiole [9,90] and therefore the landmarks used in this study and its  
57

781 coordinates could be automatically determined. Moreover, the same software used in this work permits GM  
782 3D image analysis, therefore allowing the study of plant species with a more complex architecture.  
783 A hundred years after the revolutionary vision of D'Arcy Thompson's transformation grids and more than 40  
784 years since the beginning of the revolution in morphometrics, GM application for plant phenotyping is starting  
785 to develop [34,35,91]. Thus, the research on the plant model species *Arabidopsis thaliana* should benefit from  
786 it.

### 787 **Availability of supporting data and materials**

788 Datasets supporting the results of this article are available via the *GigaScience* GigaDB repository [92].  
789  
790

### 791 **ACKNOWLEDGEMENTS**

792 We thank Dr. Flora Sánchez and Dr. Fernando Ponz for the kind gift of ORMV and TuMV virus. We thank  
793 Dr. Ken Kobayashi and Nicolás Carlotto for human treatment assignments of plants in the Discriminant  
794 Analysis comparison, Dr. Valeria Carreira for critical reading of the manuscript, Dra. Julia Sabio y García for  
795 her assistance in English grammar and vocabulary and Mr. Mariano Manacorda for assistance in adapting  
796 figure colours to the Color Universal Design for accessibility to colour-blind people. This research was  
797 supported by PICT 2014-1163 from Agencia Nacional de Promoción Científica y Tecnológica (ANPCyT) and  
798 by project PE 1131022 (INTA). The authors declare that they have no conflict of interests.  
799  
800

### 801 **Authors' contributions**

802 C.A.M. performed the experiments. C.A.M and S.A. designed the experiments, interpreted the data and wrote  
803 the manuscript. All authors read and discussed the manuscript.  
804  
805

### 806 **Figures and Tables Legends**

807 **Figure 1.** (A) Landmark configuration in a representative *Arabidopsis* rosette. An 8 DPI Mock-inoculated  
808 rosette is shown. (B) Analysis flowchart showing the different software used in this study, with main features  
809 extracted from each one listed below corresponding icon. See main text and Materials and Methods for details.  
810  
811

812 **Figure 2.** Mean Centroid Size for Mock- and ORMV-inoculated plants across the experiment. Error bars  
813 indicate +/- SE. \* =  $p < 0.05$ ; \*\* =  $p < 0.01$ ; \*\*\* =  $p < 0.0001$ , Mann-Whitney tests.  
814  
815

816 **Figure 3.** Shape variation including all observations and replicas. PCA scatterplots of (A) PC1 vs. PC2 and  
817 (B) PC3 vs. PC4. Equally colored dots represent both digitizations of the same specimen, for all DPIs. The  
818 scale factor for this graph is directly the magnitude of the shape change as a Procrustes distance in any given  
819 direction; the same scaling was used for all axes.  
820  
821

814 **Figure 4.** Shape variation between specimens (averaged by measurement replicates). PCA scatterplots of (A)  
2 PC1 vs. PC2 and (B) PC3 vs. PC4, which together explain 87.4 % of variance. Pale dots = juvenile (3-6 DPI)  
815 4 plants. Dark dots = mature (7-12 DPI) plants. (C-F) Wireframe graphs showing shape changes from the starting  
816 6 (average) shape (bluish green) to the target shape (orange) for the first four PCs. Negative (PC1) and positive  
817 8 (PCs2-4) components are shown, respectively. Here and throughout this work, leaf number is indicated in the  
818 10 wireframe in black. (G) Lollipop graph for the -PC1 component. Lollipops indicate starting position of  
819 11 landmarks with dots. (H-I) Transformation grids for (H) the starting shape and for (I) the target shape (-PC1).  
820 13 Shape changes (C-G and I) are magnified 2X for better visualization.

821 15 **Figure 5.** Discriminant analyses of shape variation between treatments at 3 (A- C), 7 (D-F) and 12 (G-I) DPI.  
822 17 Frequencies of discriminant scores obtained by resubstitution rates of assignments (A, D, G) and a jackknife  
823 18 cross-validation (B, E, H) are shown using histogram bars with percentages of correct assignments above each  
824 20 graph. Wireframes comparing mean shapes (C, F, I) are shown magnified 2 times. Mock = bluish green;  
825 22 ORMV = orange.

826 24 **Figure 6.** Allometric analyses. (A) Predicted sum of squares from regressions of shape onto ln(CS) for each  
827 26 treatment and DPI. P-values were corrected using Holm's sequential test ( $\alpha=0.05$ ). \* =  $p < 0.05$ ; \*\* =  $p < 0.01$ .  
828 28 Allometric analyses for (B, D, F, H) 3 DPI and (C, E, G, I) 4 DPI (Mock = bluish green; ORMV = orange).  
829 30 Cross-validated DAs before (B-C) and after (D-E) size correction with percentages of correct assignments  
830 31 above each graph. (F-G) Scatterplot of regression scores vs. ln (CS). (H-I) Wireframes showing starting mean  
831 33 shape (turquoise) and target shape depicting an increase in one unit of ln(CS) (blue), without magnification.

832 35 **Figure 7.** Phenotypic trajectories for Mock and ORMV (3-12 DPI). Scatterplot shows the first two PCs of  
833 37 shape variation across the experiment. Mean values for each DPI are colored and connected with lines. PTA  
834 38 parameters are given (see Materials and Methods). Mock = bluish green; ORMV = orange.

835 40 **Figure 8.** Summary of GM analyses for TuMV-infected plants. (A-C) Shape variation between specimens. (A)  
836 42 PCA scatterplot (PC1 vs. PC2). Pale dots = juvenile (4-5 DPI) plants. Dark dots = mature (7-10 DPI) plants.  
837 44 Wireframe graphs from starting (average) shape (bluish green) to target shape (reddish purple) corresponding  
838 46 to -PC1 (to the left) and +PC2 (top) are included. (B-C) Wireframes for -PC3 and -PC4, respectively. (D-E)  
839 48 Frequencies of jackknifed discriminant scores for 7 and 10 DPI respectively, with wireframes depicting shape  
840 50 changes included. Wireframes show starting shape (mock = bluish green) to the target shape (TuMV = reddish  
841 51 purple). Shape change is magnified 2X.

842 53 **Figure 9.** Comparison of virus severity. PC plots of PTA for (A) ORMV- and (D) TuMV-infected plants,  
843 55 compared with Mock-inoculated plants (4-10 DPI). PTA parameters are shown (see main text). Transformation  
844 57 grids with lollipops and Jacobian expansion factors were executed in PAST [45] for ORMV- and TuMV-  
845 58 infected plants depicting (mean) shape change from controls to virus-infected plants (B to C and E to F,  
846 59

847 respectively) at 10 DPI. Jacobian expansion factors indicate expansions of the grid (yellow to orange red for  
848 factors > 1) or contractions (blue for factors between 0 and 1). The same color scale was set for both  
849 comparisons. Lollipops indicate target position of landmarks with dots. Leaf #11 (landmarks 4, 9 and 11) is  
850 positioned at the bottom.

851 **Table 1.** Statistical tests for differences between means of treatments at each DPI from DA. Permutation tests  
852 with 1000 random runs.

853 **Table 2.** Comparative trajectory analyses for the full dataset of the ORMV experiment (3-12 DPI), the reduced  
854 dataset (4-10 DPI) and the comparisons with TuMV experiments (4-10 DPI).

855  
856 **Supplementary Figure 1.** Graphical assessment of the Tangent shape space approximation. Scatterplots of  
857 distances in the tangent space against Procrustes distances (geodesic distances in radians) for (A) Mock-  
858 inoculated plants, (B) ORMV-infected plants and (C) all plants, over all DPIs. A blue line is plotted to show a  
859 slope of 1 through the origin. Then a least-squares regression line through the origin is shown in red (for data  
860 in which the variation in shape is small this will hide the blue line).

861 **Supplementary Figure 2.** Wireframes depicting shape change associated with -PC1 values from 3 to 12 DPI  
862 (A-H). Green = starting (average) shape; red = target shape. No magnification was applied.

863 **Supplementary Table 1.** Summary statistics for the comparisons between Tangent (Euclidean) and Procrustes  
864 shape distances from average shapes and for regression slopes and correlations between the two distances.

865 **Supplementary Table 2.** Summary of centroid size and shape variation. Hierarchical sum of squares ANOVA.  
866 Main effect: Treatments; random factors: Individuals (ID), Digitization. SS, MS and df refer respectively to  
867 sum of squares, mean sum of squares (i.e., SS divided by df) and degrees of freedom. Error1 = digitization  
868 error.

869 **Supplementary Table 3.** Statistical comparisons of intra-treatment shape changes across the ORMV  
870 experiment. Holm's-Bonferroni sequential correction at  $\alpha=0.05$ .

871 **Supplementary Table 4.** Classification/misclassification tables from DA for each DPI and human observers  
872 for 7 DPI.

873 **Supplementary Table 5.** Results of allometry tests for each treatment and DPI (top) and of the regression  
874 analyses (MANCOVA), for testing differences between slopes when allometry was detected (bottom).

875 **Supplementary Table 6.** Discriminant Analysis for TuMV. Statistical tests for differences between means of  
876 treatments at each DPI from DA (with permutation tests with 1000 random runs) and  
877 classification/misclassification tables for each DPI.



880  
2  
3  
884  
5  
882  
7  
883  
9  
884  
11  
885  
13  
886  
15  
887  
17  
888  
19  
889  
21  
890  
23  
891  
25  
892  
27  
893  
29  
894  
31  
895  
33  
896  
35  
897  
37  
898  
39  
899  
41  
900  
43  
901  
45  
902  
47  
903  
49  
904  
51  
905  
53  
906  
55  
907  
57  
908  
59  
909  
61  
62  
63  
64  
65

## Bibliography:

1. Granier C, Vile D. Phenotyping and beyond: modelling the relationships between traits. *Current Opinion in Plant Biology* [Internet]. Elsevier Ltd; 2014;18:96–102. Available from: <http://linkinghub.elsevier.com/retrieve/pii/S1369526614000259>
2. International Plant Phenotyping Network [Internet]. 2016. Available from: [https://www.plant-phenotyping.org/ippn-survey\\_2016](https://www.plant-phenotyping.org/ippn-survey_2016)
3. Fahlgren N, Gehan MA, Baxter I. Lights, camera, action: high-throughput plant phenotyping is ready for a close-up. *Current Opinion in Plant Biology* [Internet]. Elsevier Current Trends; 2015 [cited 2017 Dec 19];24:93–9. Available from: <http://www.sciencedirect.com/science/article/pii/S1369526615000266?via%3Dihub>
4. Gehan MA, Kellogg EA. High-throughput phenotyping. *American journal of botany* [Internet]. Botanical Society of America; 2017 [cited 2017 Dec 19];104:505–8. Available from: <http://www.ncbi.nlm.nih.gov/pubmed/28400413>
5. Vanhaeren H, Gonzalez N, Inzé D. A Journey Through a Leaf: Phenomics Analysis of Leaf Growth in *Arabidopsis thaliana*. *The Arabidopsis Book* [Internet]. 2015;13:e0181. Available from: <http://www.bioone.org/doi/10.1199/tab.0181>
6. Dhondt S, Wuyts N, Inzé D. Cell to whole-plant phenotyping: the best is yet to come. *Trends in Plant Science* [Internet]. 2013 [cited 2017 Apr 27];18:428–39. Available from: <http://www.sciencedirect.com/science/article/pii/S1360138513000812>
7. De Vylder J, Vandebussche F, Hu Y, Philips W, Van Der Straeten D. Rosette tracker: an open source image analysis tool for automatic quantification of genotype effects. *Plant physiology* [Internet]. 2012 [cited 2014 Mar 25];160:1149–59. Available from: <http://www.pubmedcentral.nih.gov/articlerender.fcgi?artid=3490612&tool=pmcentrez&rendertype=abstract>
8. Green JM, Appel H, Rehrig EM, Harnsomburana J, Chang J-F, Balint-Kurti P, et al. PhenoPhyte: a flexible affordable method to quantify 2D phenotypes from imagery. *Plant methods* [Internet]. 2012;8:45. Available from: <http://www.pubmedcentral.nih.gov/articlerender.fcgi?artid=3546069&tool=pmcentrez&rendertype=abstract>
9. Tessmer OL, Jiao Y, Cruz J a, Kramer DM, Chen J. Functional approach to high-throughput plant growth analysis. *BMC systems biology* [Internet]. BioMed Central Ltd; 2013 [cited 2014 Mar 25];7 Suppl 6:S17. Available from: <http://www.ncbi.nlm.nih.gov/pubmed/24565437>

910 10. Camargo A, Papadopoulou D, Spyropoulou Z, Vlachonassios K, Doonan JH, Gay AP. Objective  
911 definition of rosette shape variation using a combined computer vision and data mining approach. PLoS  
912 ONE. 2014;9.  
913  
914 11. Ispiryan R, Grigoriev I, Castell W, Schäffner AR. A segmentation procedure using colour features  
915 applied to images of *Arabidopsis thaliana*. *Functional Plant Biology*. 2013;40:1065–75.  
916  
917 12. Krieger JD. Controlling for Curvature in the Quantification of Leaf Form. In: Elewa AMT, editor.  
918 *Morphometrics for Nonmorphometricians*. Springer Berlin Heidelberg; 2010. p. 27–71.  
919  
920 13. Bonhomme V, Picq S, Gaucherel C, Claude J. Momocs: outline analysis using R. *Journal of Statistical*  
921 *Software* [Internet]. 2013;56:1–24. Available from:  
922 [http://www.jstatsoft.org/v56/i13/paper%5Cnpapers3://publication/uuid/9FA27917-592B-4216-85D5-](http://www.jstatsoft.org/v56/i13/paper%5Cnpapers3://publication/uuid/9FA27917-592B-4216-85D5-BA4A85B8E698)  
923 [BA4A85B8E698](http://www.jstatsoft.org/v56/i13/paper%5Cnpapers3://publication/uuid/9FA27917-592B-4216-85D5-BA4A85B8E698)  
924  
925 14. Schneider CA, Rasband WS, Eliceiri KW. NIH Image to ImageJ: 25 years of image analysis. *Nat Meth*  
926 [Internet]. Nature Publishing Group, a division of Macmillan Publishers Limited. All Rights Reserved.;  
927 2012;9:671–5. Available from: <http://dx.doi.org/10.1038/nmeth.2089>  
928  
929 15. Lobet G. Image Analysis in Plant Sciences: Publish Then Perish. *Trends in Plant Science* [Internet]. 2017  
930 [cited 2017 Jul 12];22:559–66. Available from:  
931 <http://linkinghub.elsevier.com/retrieve/pii/S1360138517300912>  
932  
933 16. Bucksch A, Atta-Boateng A, Azihou AF, Battogtokh D, Baumgartner A, Binder BM, et al.  
934 *Morphological Plant Modeling: Unleashing Geometric and Topological Potential within the Plant Sciences*.  
935 *Frontiers in Plant Science* [Internet]. 2017 [cited 2017 Jul 12];8:900. Available from:  
936 <http://www.ncbi.nlm.nih.gov/pubmed/28659934>  
937  
938 17. Balduzzi M, Binder BM, Bucksch A, Chang C, Hong L, Iyer-Pascuzzi AS, et al. Reshaping Plant  
939 *Biology: Qualitative and Quantitative Descriptors for Plant Morphology*. *Frontiers in Plant Science*  
940 [Internet]. Frontiers; 2017 [cited 2017 Jul 12];08:117. Available from:  
941 <http://journal.frontiersin.org/article/10.3389/fpls.2017.00117/full>  
942  
943 18. Strauss RE. Foreword. In: Elewa AMT, editor. *Morphometrics for Nonmorphometricians*. Springer  
944 Berlin Heidelberg; 2010. p. v–vi.  
945  
946 19. Thompson DW. *On Growth and Form*. Dover; 1917.  
947  
948 20. Kendall DG. The diffusion of shape. *Advances in Applied Probability* [Internet]. 1977 [cited 2017 Apr  
949 27];9:428–30. Available from:  
950 [https://www.cambridge.org/core/product/identifier/S0001867800028743/type/journal\\_article](https://www.cambridge.org/core/product/identifier/S0001867800028743/type/journal_article)

- 941 21. Kendall DG, Kendall WS. Alignments in two-dimensional random sets of points. *Advances in Applied*  
942 *Probability* [Internet]. 1980 [cited 2017 Apr 27];12:380–424. Available from:  
943 [https://www.cambridge.org/core/product/identifier/S0001867800050230/type/journal\\_article](https://www.cambridge.org/core/product/identifier/S0001867800050230/type/journal_article)  
944 22. Bookstein FL. Biometrics, biomathematics and the morphometric synthesis. *Bulletin of mathematical*  
945 *biology* [Internet]. 1996 [cited 2017 Apr 27];58:313–65. Available from:  
946 <http://www.ncbi.nlm.nih.gov/pubmed/8713662>  
947 23. James Rohlf F, Marcus LF. A revolution morphometrics. *Trends in Ecology & Evolution* [Internet]. 1993  
948 [cited 2017 Apr 27];8:129–32. Available from:  
949 <http://linkinghub.elsevier.com/retrieve/pii/016953479390024J>  
950 24. Adams DC, Rohlf FJ, Slice DE. Geometric morphometrics: Ten years of progress following the  
951 ‘revolution.’ *Italian Journal of Zoology*. 2004;71:5–16.  
952 25. Cardini A, Loy A. On growth and form in the “computer era”: from geometric to biological  
953 morphometrics. In: Cardini A, Loy A, editors. *Virtual Morphology and Evolutionary Morphometrics in the*  
954 *new millennium*. Associazione Teriologica Italiana; 2013. p. 1–5.  
955 26. Slice DE, Bookstein FL, Marcus LF, Rohlf FJ. A Glossary for Geometric Morphometrics [Internet].  
956 2016. Available from: <http://life.bio.sunysb.edu/morph/glossary/gloss1.html>  
957 27. Cope J, Corney D, Clark J, Remagnino P, Wilkin P. Plant species identification using digital  
958 morphometrics: a review. 2012; Available from: <http://dx.doi.org/10.1016/j.eswa.2012.01.073>  
959 28. Claude J. Log-shape ratios, Procrustes superimposition, elliptic Fourier analysis: three worked examples  
960 in R. In: Cardini A, Loy A, editors. *Virtual Morphology and Evolutionary Morphometrics in the new*  
961 *millennium*. Associazione Teriologica Italiana; 2013. p. 94–102.  
962 29. Zelditch ML, Sheets HD, Fink WL. Spatiotemporal Reorganization of Growth Rates in the Evolution of  
963 Ontogeny. *Evolution* [Internet]. 2000;54:1363–71. Available from: [http://doi.wiley.com/10.1111/j.0014-](http://doi.wiley.com/10.1111/j.0014-3820.2000.tb00568.x)  
964 [3820.2000.tb00568.x](http://doi.wiley.com/10.1111/j.0014-3820.2000.tb00568.x)  
965 30. MacLeod N, Krieger J, Jones KE. Geometric Morphometric Approaches to Acoustic Signal Analysis in  
966 *Mammalian Biology*. In: Cardini A, Loy A, editors. *Virtual Morphology and Evolutionary Morphometrics in the*  
967 *new millennium*. Associazione Teriologica Italiana; 2013. p. 110–25.  
968 31. Cardini A, Loy A, editors. *Virtual Morphology and Evolutionary Morphometrics in the new millenium*.  
969 [Internet]. *the Italian Journal of Mammalogy*. Associazione Teriologica Italiana; 2013 [cited 2017 Dec 19].  
970 Available from: [http://www.italian-journal-of-mammalogy.it/public/journals/3/issue\\_241\\_complete\\_100.pdf](http://www.italian-journal-of-mammalogy.it/public/journals/3/issue_241_complete_100.pdf)  
971 32. Ros J, Evin A, Bouby L, Ruas M-P. Geometric morphometric analysis of grain shape and the

972 identification of two-rowed barley (*Hordeum vulgare* subsp. *distichum* L.) in southern France. *Journal of*  
 2  
 973 *Archaeological Science* [Internet]. Academic Press; 2014 [cited 2017 Dec 19];41:568–75. Available from:  
 4  
 974 <http://www.sciencedirect.com/science/article/pii/S0305440313003282>  
 6

975 33. Chitwood DH, Rundell SM, Li DY, Woodford QL, Yu TT, Lopez JR, et al. Climate and developmental  
 8  
 976 plasticity: interannual variability in grapevine leaf morphology. *Plant Physiology* [Internet].  
 10  
 977 2016;170:pp.01825.2015. Available from: <http://www.plantphysiol.org/content/170/3/1480.abstract?etoc>  
 12

978 34. Viscosi V. Geometric morphometrics and leaf phenotypic plasticity: Assessing fluctuating asymmetry  
 14  
 979 and allometry in European white oaks (*Quercus*). *Botanical Journal of the Linnean Society*. 2015;179:335–  
 16  
 980 48.  
 18

981 35. Viscosi V, Cardini A. Leaf morphology, taxonomy and geometric morphometrics: A simplified protocol  
 20  
 982 for beginners. *PLoS ONE*. 2011;6.  
 22

983 36. Scholthof KG, Adkins S, Czosnek H, Palukaitis P, Jacquot E, Hohn T, et al. Top 10 plant viruses in  
 24  
 984 molecular plant pathology. 2011;12:938–54.  
 26

985 37. Matthews REF (Richard EF, Hull R, Matthews REF (Richard EF. *Matthews’ plant virology*. [Internet].  
 28  
 986 Academic Press; 2002 [cited 2017 Aug 14]. Available from:  
 30  
 987 <http://www.sciencedirect.com/science/book/9780123611604>  
 32

988 38. Zavallo D, Debat HJ, Conti G, Manacorda CA, Rodriguez MC, Asurmendi S. Differential mRNA  
 34  
 989 accumulation upon early *Arabidopsis thaliana* infection with ORMV and TMV-Cg is associated with distinct  
 36  
 990 endogenous small RNAs level. *PLoS ONE*. 2015;10.  
 38

991 39. Manacorda CA, Mansilla C, Debat HJ, Zavallo D, Sánchez F, Ponz F, et al. Salicylic Acid Determines  
 40  
 992 Differential Senescence Produced by Two Turnip mosaic virus Strains Involving Reactive Oxygen Species  
 42  
 993 and Early Transcriptomic Changes. *Molecular plant-microbe interactions : MPMI* [Internet]. 2013;26:1486–  
 44  
 994 98. Available from: <http://www.ncbi.nlm.nih.gov/pubmed/23945002>  
 45

995 40. Sánchez F, Manrique P, Mansilla C, Lunello P, Wang X, Rodrigo G, et al. Viral Strain-Specific  
 48  
 996 Differential Alterations in *Arabidopsis* Developmental Patterns. *Molecular Plant-Microbe Interactions*.  
 49  
 997 2015;28:1304–15.  
 51

998 41. Doumayrou J, Leblaye S, Froissart R, Michalakakis Y. Reduction of leaf area and symptom severity as  
 52  
 999 proxies of disease-induced plant mortality: the example of the Cauliflower mosaic virus infecting two  
 54  
 1000 Brassicaceae hosts. *Virus research* [Internet]. Elsevier B.V.; 2013 [cited 2014 Mar 21];176:91–100.  
 57  
 1001 Available from: <http://www.ncbi.nlm.nih.gov/pubmed/23742852>  
 59

1002 42. Ferrier T, Matus JT, Jin J, Riechmann JL. *Arabidopsis* paves the way: genomic and network analyses in  
 61  
 62  
 63  
 64  
 65

1003 crops. *Current Opinion in Biotechnology* [Internet]. 2011 [cited 2017 Apr 27];22:260–70. Available from:  
1004 <http://www.sciencedirect.com/science/article/pii/S0958166910002284>

1005 43. Zelditch ML, Swiderski DL, Sheets HD. *Geometric morphometrics for biologists: a primer*. London:  
1006 Academic Press; 2012.

1007 44. Klingenberg CP. MorphoJ: An integrated software package for geometric morphometrics. *Molecular*  
1008 *Ecology Resources*. 2011;11:353–7.

1009 45. Hammer Ø, Harper DAT, Ryan PD. PAST: Paleontological Statistics Software Package for Education  
1010 and Data Analysis. *Palaeontologia Electronica* [Internet]. 2001;4. Available from:  
1011 <http://folk.uio.no/ohammer/past>

1012 46. Rohlf FJ. The tps series of software. *Hystrix, the Italian Journal of Mammalogy*. 2015;26:1–4.

1013 47. Aguilar I, Sánchez F, Martín AM, Martínez-herrera D, Ponz F. Nucleotide sequence of Chinese rape  
1014 mosaic virus (oilseed rape mosaic virus), a crucifer tobamovirus infectious on *Arabidopsis thaliana*. *Plant*  
1015 *molecular biology*. 1996;191–7.

1016 48. Sánchez F, Martínez-Herrera D, Aguilar I, Ponz F. Infectivity of turnip mosaic potyvirus cDNA clones  
1017 and transcripts on the systemic host *Arabidopsis thaliana* and local lesion hosts. *Virus research* [Internet].  
1018 1998;55:207–19. Available from: <http://www.ncbi.nlm.nih.gov/pubmed/9725673>

1019 49. Boyes DC, Zayed a M, Ascenzi R, McCaskill a J, Hoffman NE, Davis KR, et al. Growth stage-based  
1020 phenotypic analysis of *Arabidopsis*: a model for high throughput functional genomics in plants. *The Plant*  
1021 *cell* [Internet]. 2001;13:1499–510. Available from:  
1022 <http://www.pubmedcentral.nih.gov/articlerender.fcgi?artid=139543&tool=pmcentrez&rendertype=abstract>

1023 50. Schutz H, Krieger J. *Guide to geometric morphometrics*. 2007.

1024 51. Klingenberg C, Peter C. *Analyzing Fluctuating Asymmetry with Geometric Morphometrics: Concepts,*  
1025 *Methods, and Applications*. *Symmetry* [Internet]. Multidisciplinary Digital Publishing Institute; 2015 [cited  
1026 2017 Dec 27];7:843–934. Available from: <http://www.mdpi.com/2073-8994/7/2/843/>

1027 52. Oxnard C, O’Higgins P. *Biology Clearly Needs Morphometrics. Does Morphometrics Need Biology?*  
1028 *Biological Theory* [Internet]. Springer Netherlands; 2009 [cited 2017 Dec 28];4:84–97. Available from:  
1029 <http://www.mitpressjournals.org/doi/abs/10.1162/biot.2009.4.1.84>

1030 53. Nikovics K, Blein T, Peaucelle A, Ishida T, Morin H, Aida M, et al. The balance between the MIR164A  
1031 and CUC2 genes controls leaf margin serration in *Arabidopsis*. *The Plant cell* [Internet]. 2006 [cited 2010 Jul  
1032 1];18:2929–45. Available from:  
1033 <http://www.pubmedcentral.nih.gov/articlerender.fcgi?artid=1693934&tool=pmcentrez&rendertype=abstract>

1034 54. Bilsborough GD, Runions A, Barkoulas M, Jenkins HW, Hasson A, Galinha C, et al. Model for the  
2 regulation of *Arabidopsis thaliana* leaf margin development. *Proceedings of the National Academy of*  
1035 *Sciences of the United States of America*. 2011;108:3424–9.  
4  
1036  
6  
1037 55. Biot E, Cortizo M, Burguet J, Kiss A, Oughou M, Maugarny-Calè S A, et al. Multiscale quantification of  
8 morphodynamics: MorphoLeaf software for 2D shape analysis. [cited 2017 Oct 12]; Available from:  
1038 <http://dev.biologists.org/content/develop/143/18/3417.full.pdf>  
10  
1039  
12  
1040 56. Carreira VP, Soto IM, Mensch J, Fanara JJ. Genetic basis of wing morphogenesis in *Drosophila*: sexual  
14 dimorphism and non-allometric effects of shape variation. *BMC developmental biology* [Internet]. *BioMed*  
1041 *Central*; 2011 [cited 2017 May 6];11:32. Available from: <http://www.ncbi.nlm.nih.gov/pubmed/21635778>  
16  
1042  
18  
1043 57. Bookstein FL. *Morphometric tools for landmark data: Geometry and biology*. Cambridge: Cambridge  
20 *University Press*; 1991.  
22  
1044  
24  
1045 58. Berger BA, Ricigliano VA, Savriama Y, Lim A, Thompson V, Howarth DG. Geometric morphometrics  
26 reveals shifts in flower shape symmetry and size following gene knockdown of *CYCLOIDEA* and  
1046 *ANTHOCYANIDIN SYNTHASE*. *BMC Plant Biology* [Internet]. 2017 [cited 2017 Dec 27];17:205.  
28 Available from: <https://bmcplantbiol.biomedcentral.com/articles/10.1186/s12870-017-1152-x>  
29  
30  
1047  
32  
1048 59. Savriama Y, Gómez JM, Perfectti F, Klingenberg CP. Geometric morphometrics of corolla shape:  
34 dissecting components of symmetric and asymmetric variation in *Erysimum mediohispanicum*  
1049 (*Brassicaceae*). *New Phytologist* [Internet]. 2012 [cited 2017 Dec 27];196:945–54. Available from:  
36 <http://www.ncbi.nlm.nih.gov/pubmed/22988918>  
37  
38  
1050  
40  
1051 60. Tucić B, Budečević S, Manitašević Jovanović S, Vuleta A, Klingenberg CP. Phenotypic plasticity in  
42 response to environmental heterogeneity contributes to fluctuating asymmetry in plants: first empirical  
1052 evidence. *Journal of Evolutionary Biology* [Internet]. 2017 [cited 2017 Dec 27]; Available from:  
44 <http://www.ncbi.nlm.nih.gov/pubmed/29134739>  
45  
46  
1053  
48  
1054 61. Chitwood DH, Headland LR, Ranjan A, Martinez CC, Braybrook SA, Koenig DP, et al. Leaf asymmetry  
50 as a developmental constraint imposed by auxin-dependent phyllotactic patterning. *The Plant cell* [Internet].  
1055 *American Society of Plant Biologists*; 2012 [cited 2017 Dec 27];24:2318–27. Available from:  
52 <http://www.ncbi.nlm.nih.gov/pubmed/22722959>  
53  
54  
1056  
56  
1057 62. Peaucelle A, Morin H, Traas J, Laufs P. Plants expressing a miR164-resistant *CUC2* gene reveal the  
58 importance of post-meristematic maintenance of phyllotaxy in *Arabidopsis*. *Development* (Cambridge,  
1059 *England*) [Internet]. 2007;134:1045–50. Available from: <http://www.ncbi.nlm.nih.gov/pubmed/17251269>  
60  
61  
1060  
62  
1061 63. Bookstein FL. *Advances in Morphometrics*. In: Marcus LF, Corti M, Loy A, Naylor GJ, Slice DE,  
63  
64  
65

1065 editors. *Advances in Morphometrics*. New York: Plenum Press; 1996. p. 131–151.  
2

1066 64. Shaw RG, Mitchell-Olds T. Anova for Unbalanced Data: An Overview. *Ecology* [Internet].  
3  
4  
1067 WileyEcological Society of America; 1993 [cited 2018 Jan 19];74:1638–45. Available from:  
5  
6  
1068 <http://doi.wiley.com/10.2307/1939922>  
8

1069 65. Goodall CR. Procrustes methods in the statistical analysis of shape. *J. R. Stat. Soc. B* [Internet]. 1991  
9  
10  
1070 [cited 2018 Jan 22];53:285–339. Available from: <http://www.jstor.org/stable/2345744>  
12

1071 66. Klingenberg CP, Barluenga M, Meyer A. SHAPE ANALYSIS OF SYMMETRIC STRUCTURES:  
13  
14  
1072 QUANTIFYING VARIATION AMONG INDIVIDUALS AND ASYMMETRY. *Evolution* [Internet]. 2002  
15  
16  
1073 [cited 2018 Jan 22];56:1909–20. Available from: [http://www.flywings.org.uk/PDF files/Evol2002.pdf](http://www.flywings.org.uk/PDF%20files/Evol2002.pdf)  
18

1074 67. Bookstein FL. A method of factor analysis for shape coordinates. *American Journal of Physical*  
19  
20  
1075 *Anthropology* [Internet]. 2017 [cited 2018 Jan 22];164:221–45. Available from:  
21  
22  
1076 <http://doi.wiley.com/10.1002/ajpa.23277>  
24

1077 68. Howells WW. Introduction. *Multivariate Statistical Methods in Physical Anthropology* [Internet].  
25  
26  
1078 Dordrecht: Springer Netherlands; 1984 [cited 2018 Jan 22]. p. 1–11. Available from:  
27  
28  
1079 [http://link.springer.com/10.1007/978-94-009-6357-3\\_1](http://link.springer.com/10.1007/978-94-009-6357-3_1)  
30

1080 69. Klingenberg CP. Visualizations in geometric morphometrics: How to read and how to make graphs  
31  
32  
1081 showing shape changes. *Hystrix*. 2013;24:15–24.  
34

1082 70. Klingenberg CP. Size, shape and form: concepts of allometry in geometric morphometrics. *Development*  
35  
36  
1083 *Genes and Evolution* [Internet]. *Development Genes and Evolution*; 2016;1–25. Available from:  
37  
38  
1084 <http://dx.doi.org/10.1007/s00427-016-0539-2>  
40

1085 71. Adams DC, Collyer ML. A general framework for the analysis of phenotypic trajectories in evolutionary  
41  
42  
1086 studies. *Evolution*. 2009;63:1143–54.  
44

1087 72. RStudio Team. *RStudio: Integrated Development for R*. [Internet]. Boston, MA: RStudio, Inc.; 2016.  
45  
46  
1088 Available from: <http://www.rstudio.com/>  
48

1089 73. RCoreTeam. *R: A language and environment for statistical computing* [Internet]. Vienna: R Foundation  
49  
50  
1090 for Statistical Computing; 2016. Available from: <https://www.r-project.org/>  
51  
52

1091 74. Ciampaglio CN, Kemp M, McShea DW. Detecting changes in morphospace occupation patterns in the  
53  
54  
1092 fossil record: characterization and analysis of measures of disparity. *Paleobiology* [Internet]. 2001;27:695–  
55  
56

1093 715. Available from: [http://www.bioone.org/doi/abs/10.1666/0094-  
57  
58  
1094 8373%282001%29027%3C0695%3ADCIMOP%3E2.0.CO%3B2](http://www.bioone.org/doi/abs/10.1666/0094-8373%282001%29027%3C0695%3ADCIMOP%3E2.0.CO%3B2)  
59  
60  
61  
62  
63  
64  
65

- 1095 75. Sidlauskas B. Continuous and arrested morphological diversification in sister clades of characiform  
2 fishes: A phylomorphospace approach. *Evolution*. 2008;62:3135–56.
- 1096 76. Gaetano J. Holm-Bonferroni Sequential Correction: An EXCEL Calculator. 2013.  
4
- 1097 77. Holm S. A Simple Sequentially Rejective Multiple Test Procedure. *Scand J Statist* [Internet]. 1979 [cited  
7 2017 May 25];6:65–70. Available from: <http://www.jstor.org/stable/4615733>
- 1098  
1099  
1100 78. Zaiontz C. Real Statistics Resource Pack software [Internet]. 2017. Available from: [www.real-](http://www.real-statistics.com)  
12 [statistics.com](http://www.real-statistics.com)
- 1101  
1102 79. Dewulf A, De Meulemeester T, Dehon M, Engel M, Michez D. A new interpretation of the bee fossil  
15 *Melitta willardi* Cockerell (Hymenoptera, Melittidae) based on geometric morphometrics of the wing.  
17 *ZooKeys* [Internet]. Pensoft Publishers; 2014 [cited 2017 May 10];389:35–48. Available from:  
18  
1103  
1104 <http://zookeys.pensoft.net/articles.php?id=3536>  
20
- 1105 80. Bai M, McCullough E, Song K-Q, Liu W-G, Yang X-K. Evolutionary Constraints in Hind Wing Shape in  
23 Chinese Dung Beetles (Coleoptera: Scarabaeinae). Sereno PC, editor. *PLoS ONE* [Internet]. Elsevier  
24  
1106  
1107 Academic Press; 2011 [cited 2017 May 10];6:e21600. Available from:  
26  
1108  
1109 <http://dx.plos.org/10.1371/journal.pone.0021600>  
30
- 1110 81. Parés-Casanova PM, Allés C. No functional sexual dimorphism in Minorcan horse assessed by geometric  
32 morphometric methods. *Animal Genetic Resources/Ressources génétiques animales/Recursos genéticos*  
34 *animales* [Internet]. 2015 [cited 2017 May 10];56:91–5. Available from:  
1111  
1112 [http://www.journals.cambridge.org/abstract\\_S2078633614000514](http://www.journals.cambridge.org/abstract_S2078633614000514)  
36  
1113  
1114 82. ViralZone [Internet]. Available from: <https://viralzone.expasy.org/>  
38  
1115  
1116 83. Taiz L, Zeiger E. *Plant physiology*. 4th ed. Sinauer Associates Inc., editor. Sunderland; 2006.  
42
- 1117 84. GOULD SJ. ALLOMETRY AND SIZE IN ONTOGENY AND PHYLOGENY. *Biological Reviews*  
43 [Internet]. Blackwell Publishing Ltd; 1966 [cited 2018 Jan 24];41:587–638. Available from:  
44  
1118  
1119 <http://doi.wiley.com/10.1111/j.1469-185X.1966.tb01624.x>  
46  
1120  
1121 85. Cardini A, Seetah K, Barker G. How many specimens do I need? Sampling error in geometric  
48 morphometrics: testing the sensitivity of means and variances in simple randomized selection experiments.  
50  
1122  
1123 *Zoomorphology* [Internet]. Springer Berlin Heidelberg; 2015;134:149–63. Available from:  
52  
1124  
1125 <http://dx.doi.org/10.1007/s00435-015-0253-z>  
54  
1126  
1127 86. Pigliucci M. Studying the plasticity of phenotypic integration in a model organism. In: Pigliucci M,  
58  
1128  
1129 Preston K, editors. *Phenotypic integration: studying the ecology and evolution of complex phenotypes*. New  
60  
1130  
1131 York: Oxford University Press on Demand; 2004. p. 155–75.  
62  
63  
64  
65



1126 87. Roth V. On three-dimensional morphometrics, and on the identification of landmark points.  
 2  
 1127 Contributions to Morphometrics. Madrid: Consejo Superior De Investigaciones Científicas; 1993. p. 41–61.  
 4  
 1128 88. Cardini A. Missing the third dimension in geometric morphometrics: how to assess if 2D images really  
 6  
 1129 are a good proxy for 3D structures? *Hystrix, the Italian Journal of Mammalogy* [Internet]. 2014 [cited 2017  
 8  
 1130 Dec 21];25:73–81. Available from: <http://www.italian-journal-of-mammalogy.it/article/view/10993/pdf>  
 10  
 1131 89. Punyasena SW, Smith SY. *Bioinformatic and Biometric Methods in Plant Morphology. Applications in*  
 12  
 1132 *Plant Sciences* [Internet]. 2014;2:1400071. Available from:  
 14  
 1133 <http://www.bioone.org/doi/abs/10.3732/apps.1400071>  
 16  
 1134 90. Apelt F, Breuer D, Nikoloski Z, Stitt M, Kragler F. Phytotyping <sup>4D</sup> : a light-field imaging system for non-  
 18  
 1135 invasive and accurate monitoring of spatio-temporal plant growth. *The Plant Journal* [Internet]. 2015 [cited  
 20  
 1136 2017 Jun 7];82:693–706. Available from: <http://www.ncbi.nlm.nih.gov/pubmed/25801304>  
 22  
 1137 91. Gómez JM, Torices R, Lorite J, Klingenberg CP, Perfectti F. The role of pollinators in the evolution of  
 24  
 1138 corolla shape variation, disparity and integration in a highly diversified plant family with a conserved floral  
 26  
 1139 bauplan. *Annals of Botany* [Internet]. 2016 [cited 2017 May 23];117:889–904. Available from:  
 28  
 1140 <http://www.ncbi.nlm.nih.gov/pubmed/26884512>  
 30  
 1141 92. Manacorda CA, Asurmendi S. Supporting data for "Arabidopsis phenotyping through Geometric  
 32  
 1142 Morphometrics". *GigaScience Database* 2018. <http://dx.doi.org/10.5524/100457>  
 34  
 1143  
 36  
 1144  
 38  
 39  
 40  
 41  
 42  
 43  
 44  
 45  
 46  
 47  
 48  
 49  
 50  
 51  
 52  
 53  
 54  
 55  
 56  
 57  
 58  
 59  
 60  
 61  
 62  
 63  
 64  
 65

| <b>Discriminant Function Analysis</b>                          | <b>3 DPI</b> | <b>4 DPI</b> | <b>5 DPI</b> |
|----------------------------------------------------------------|--------------|--------------|--------------|
| Difference between means:                                      |              |              |              |
| Procrustes distance:                                           | 0.037        | 0.047        | 0.063        |
| Mahalanobis distance:                                          | 1.799        | 1.924        | 3.815        |
| T-square:                                                      | 31.637       | 36.170       | 142.264      |
| <i>P-value (parametric):</i>                                   | 0.521        | 0.405        | 0.001        |
| <b>P-values for permutation tests (1000 permutation runs):</b> |              |              |              |
| <i>Procrustes distance:</i>                                    | 0.549        | 0.182        | 0.005        |
| <i>T-square (Mahalanobis distance):</i>                        | 0.523        | 0.417        | 0.001        |

| <b>6 DPI</b> | <b>7 DPI</b> | <b>8 DPI</b> | <b>10 DPI</b> | <b>12 DPI</b> |
|--------------|--------------|--------------|---------------|---------------|
| 0.087        | 0.097        | 0.105        | 0.149         | 0.189         |
| 5.117        | 6.651        | 7.035        | 9.078         | 10.863        |
| 255.916      | 432.438      | 483.790      | 805.573       | 1153.389      |
| <0,0001      | <0,0001      | <0,0001      | <0,0001       | <0,0001       |
| 0.002        | <0,0001      | <0,0001      | <0,0001       | <0,0001       |
| <0,0001      | <0,0001      | <0,0001      | <0,0001       | <0,0001       |

**ORMV3-12 DPI<sup>(a)</sup>**

|                                     |        | <i>p-value</i>  |
|-------------------------------------|--------|-----------------|
| $MD_{Mock,ORMV}$                    | 0.100  | <b>0.003</b>    |
| $\vartheta_{Mock,ORMV}$             | 18,34° | <b>0.001</b>    |
| $D_{ShapeMock, ORMV}$               | 0.367  | <b>0.001</b>    |
| $MPL_{Mock}$                        | 0.696  | <b>2.50E-04</b> |
| $MPL_{ORMV}$                        | 0.596  |                 |
| $\Sigma Var_{Mock}$                 | 0.035  | <b>2.52E-06</b> |
| $\Sigma Var_{ORMV}$                 | 0.023  |                 |
| $D_{1(Mock)}$                       | 20.21  | <b>2.89E-06</b> |
| $D_{1(ORMV)}$                       | 26.93  |                 |
| Hyperellipse <sub>(IC95%)Mock</sub> | 0.022  | <b>0,005 *</b>  |
| Hyperellipse <sub>(IC95%)ORMV</sub> | 0.014  |                 |
| $D_{2(Mock)}$                       | 32.97  | <b>0,040 *</b>  |
| $D_{2(ORMV)}$                       | 41.87  |                 |

**ORMV4-10 DPI<sup>(a)</sup>**

|                                     |        |                   |
|-------------------------------------|--------|-------------------|
| $MD_{Mock,ORMV}$                    | 0.085  | <b>0.005</b>      |
| $\vartheta_{Mock,ORMV}$             | 16,46° | <b>0.001</b>      |
| $D_{ShapeMock, ORMV}$               | 0.343  | <b>0.037</b>      |
| $MPL_{Mock}$                        | 0.472  | <b>8,03E-04 *</b> |
| $MPL_{ORMV}$                        | 0.401  |                   |
| $\Sigma Var_{Mock}$                 | 0.022  | <b>2,21E-05 *</b> |
| $\Sigma Var_{ORMV}$                 | 0.015  |                   |
| $D_{1(Mock)}$                       | 21.77  | <b>3,61E-05 *</b> |
| $D_{1(ORMV)}$                       | 28.37  |                   |
| Hyperellipse <sub>(IC95%)Mock</sub> | 0.012  | 0,075 *           |
| Hyperellipse <sub>(IC95%)ORMV</sub> | 0.009  |                   |
| $D_{2(Mock)}$                       | 48.94  | 0,203 *           |
| $D_{2(ORMV)}$                       | 56.41  |                   |

**TuMV4-10 DPI 1st<sup>(b)</sup>**

|                                     |        |                |
|-------------------------------------|--------|----------------|
| $MD_{Mock,TuMV}$                    | 0.093  | <b>0.015</b>   |
| $\vartheta_{Mock,TuMV}$             | 34,41° | <b>0.001</b>   |
| $D_{ShapeMock, TuMV}$               | 0.613  | <b>0.001</b>   |
| $MPL_{Mock}$                        | 0.504  | <b>0,049 *</b> |
| $MPL_{TuMV}$                        | 0.461  |                |
| $\Sigma Var_{Mock}$                 | 0.030  | <b>0,007 *</b> |
| $\Sigma Var_{TuMV}$                 | 0.023  |                |
| $D_{1(Mock)}$                       | 16.94  | <b>0,017 *</b> |
| $D_{1(TuMV)}$                       | 21.83  |                |
| Hyperellipse <sub>(IC95%)Mock</sub> | 0.019  | 0,156 *        |
| Hyperellipse <sub>(IC95%)TuMV</sub> | 0.017  |                |

|                                       |        |              |
|---------------------------------------|--------|--------------|
| $D_{2(\text{Mock})}$                  | 32.51  | 0,277 *      |
| $D_{2(\text{TuMV})}$                  | 46.05  |              |
| <b>TuMV4-10 DPI 2nd<sup>(c)</sup></b> |        |              |
| $MD_{\text{Mock, TuMV}}$              | 0.082  | 0.202        |
| $\vartheta_{\text{Mock, TuMV}}$       | 35,05° | <b>0.001</b> |
| $D_{\text{ShapeMock, TuMV}}$          | 0.642  | <b>0.002</b> |

\*= First 3 PCs considered (>95% total variance)

Units: MD =  $D_{\text{Shape}}$  = MPL = D1 = D2 = Euclidean distance.  $\theta$  = degrees.  $\Sigma\text{Var}$  = Hyperellipse<sub>(CI=95%)</sub> = dime

Statistically significant results in **bold**

<sup>(a)</sup> N = 23 (Mock) and 17 (ORMV)

<sup>(b)</sup> N = 27 (Mock) and 14 (TuMV)

<sup>(c)</sup> N = 14 (Mock) and 8 (TuMV)



nsionless.

Figure 1

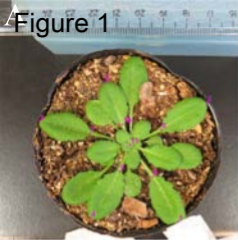

B

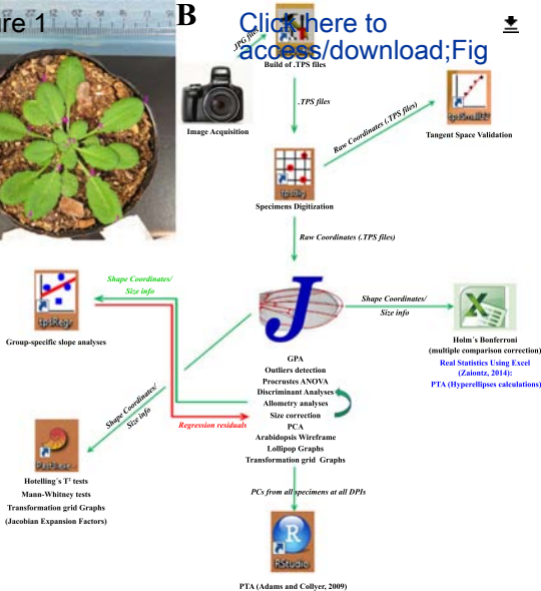



Figure 2

Click here to  
access/download; Figu

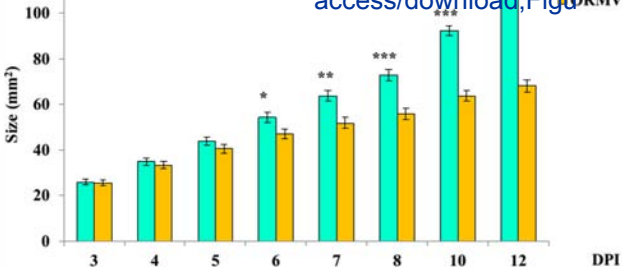

Figure 3  
A

[Click here to access/download;Figu](#)

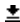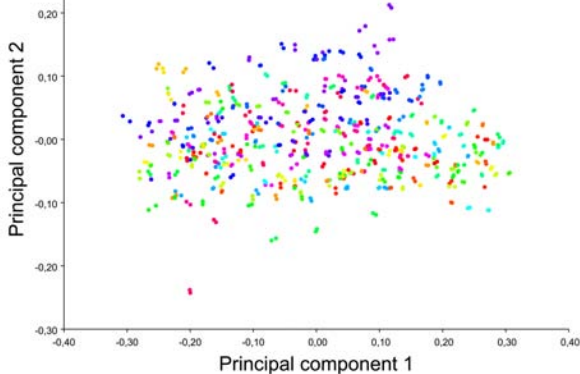

B

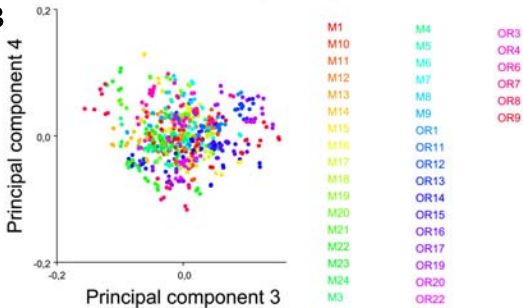

Figure 4

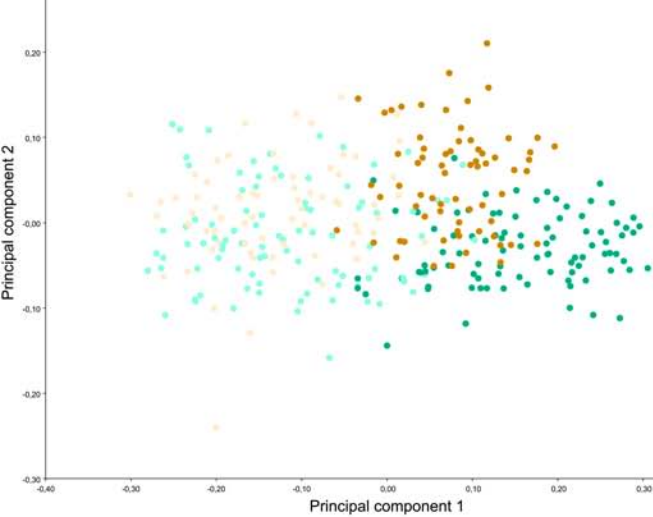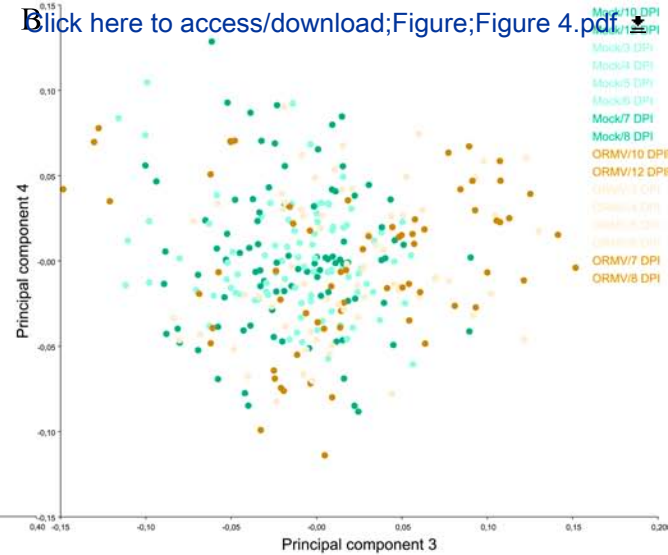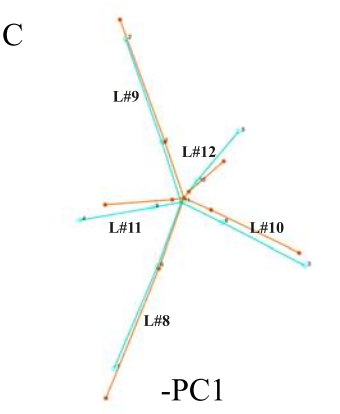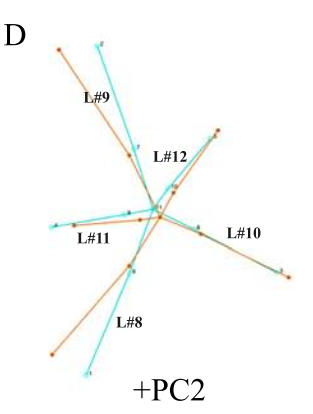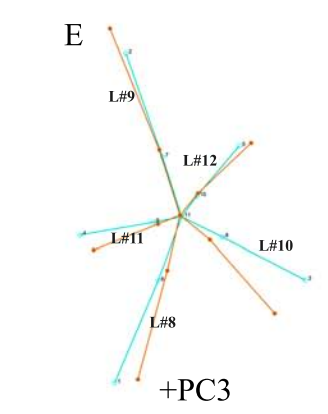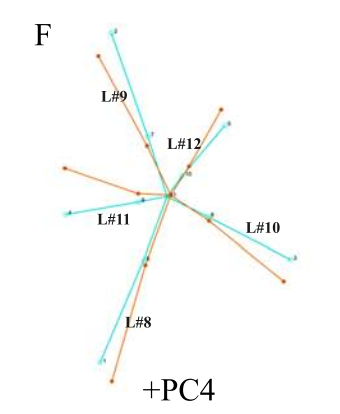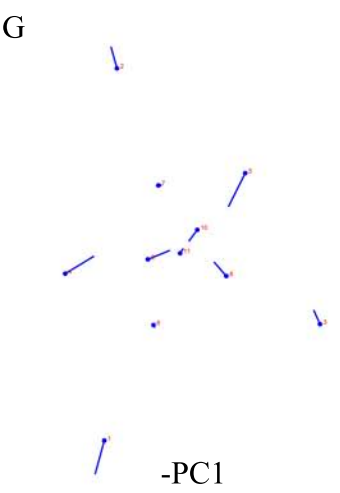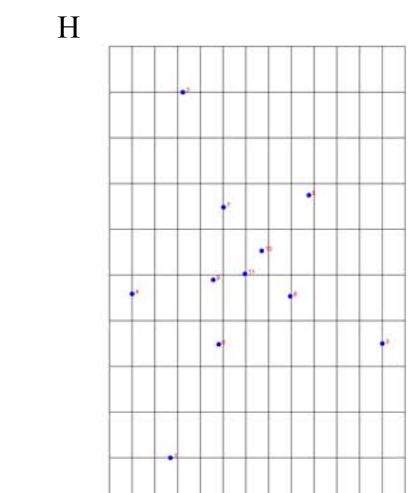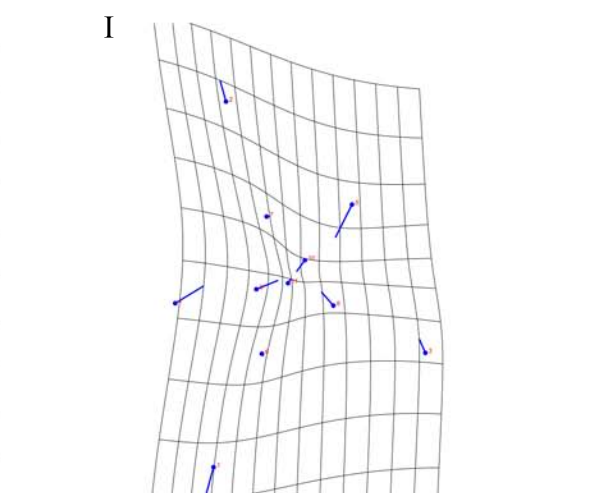

[Click here to access/download;Figure;Figure 4.pdf](#)

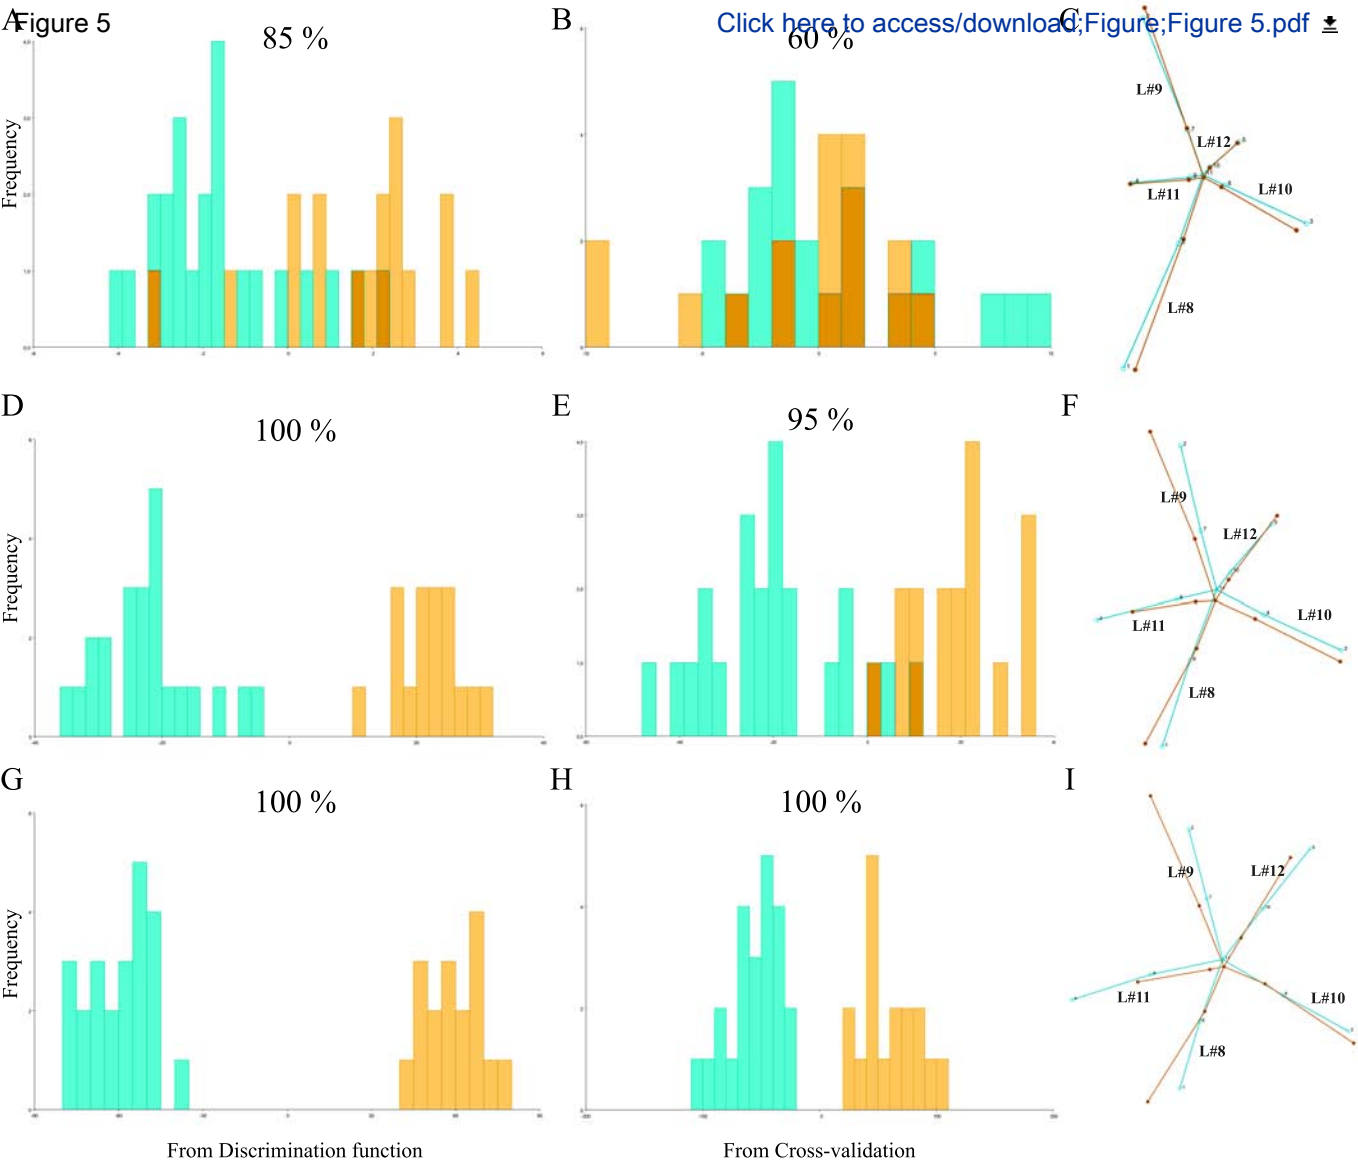

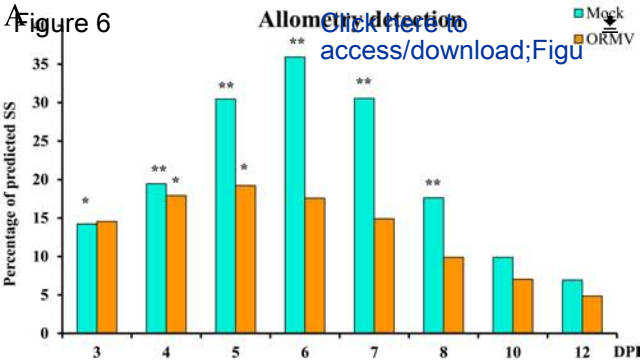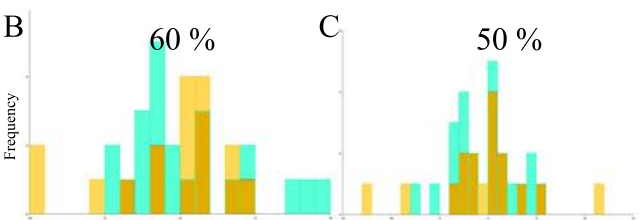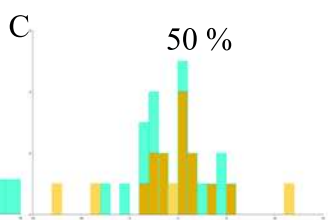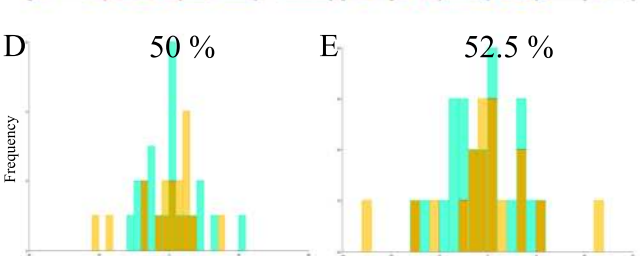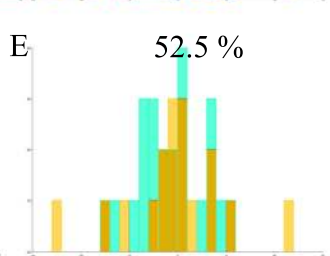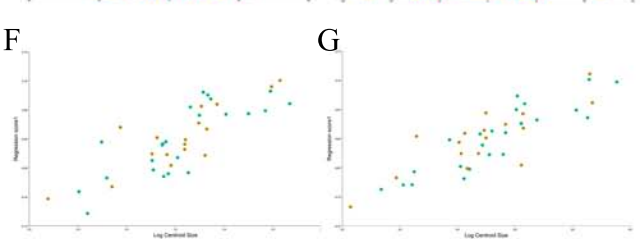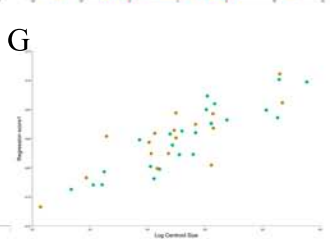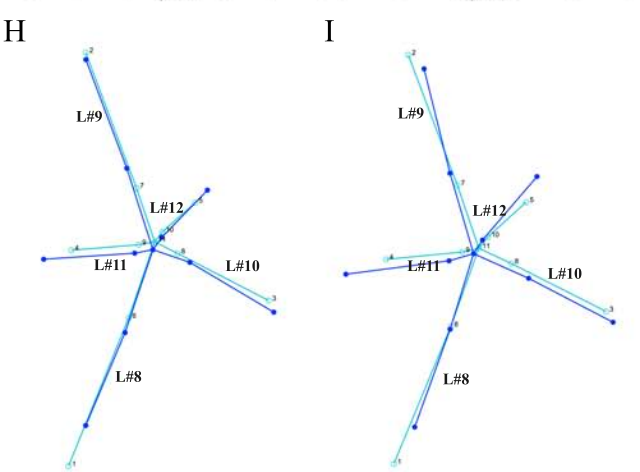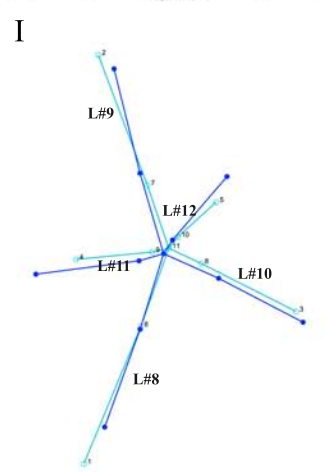

Figure 7

[Click here to access/download;Figu](#)

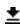

$$MD_{\text{Mock,ORMV}} = 0.100 \quad p = 0.005$$

$$D_{\text{ShapeMock,ORMV}} = 0.367 \quad p = 0.001$$

$$\theta_{\text{Mock,ORMV}} = 18.34^\circ \quad p = 0.001$$

PCII

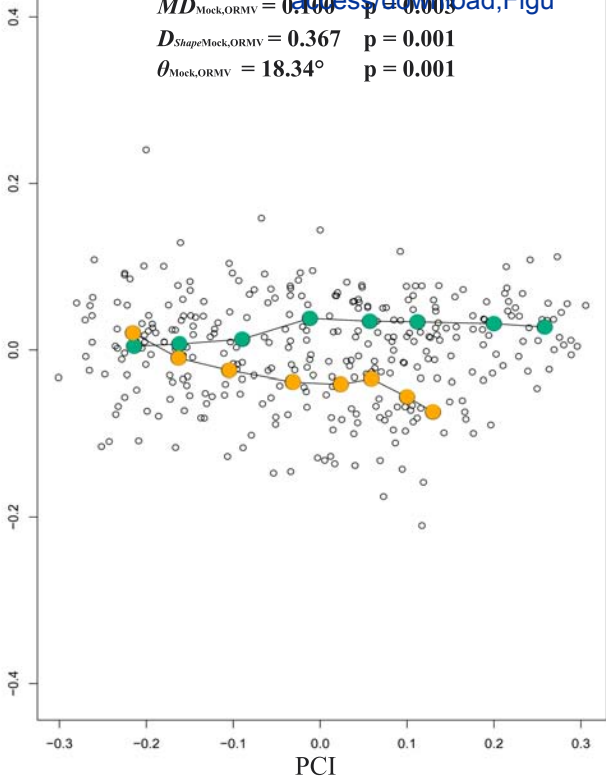

Figure 8

[Click here to access/download/B;Figure;Figure\\_8.pdf](#)

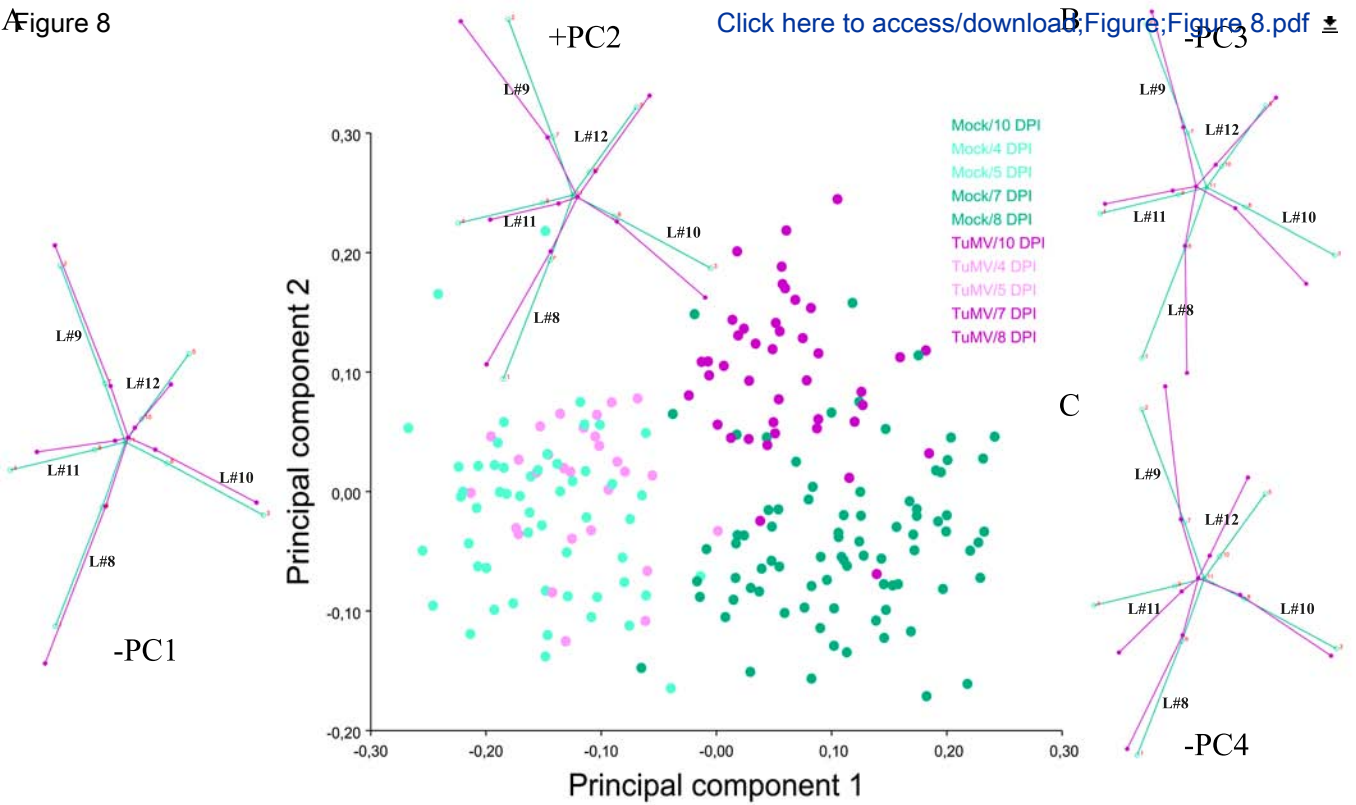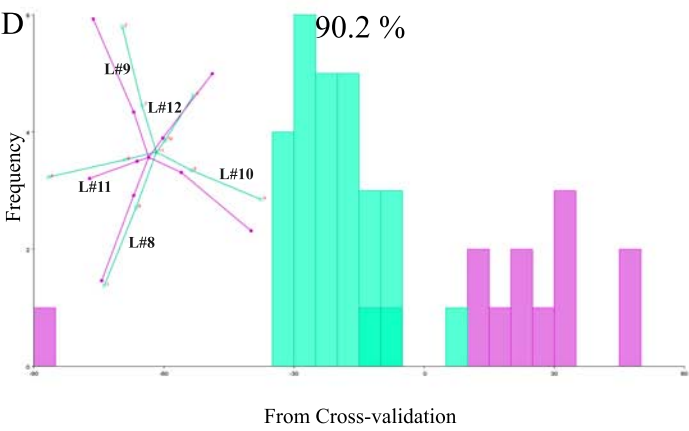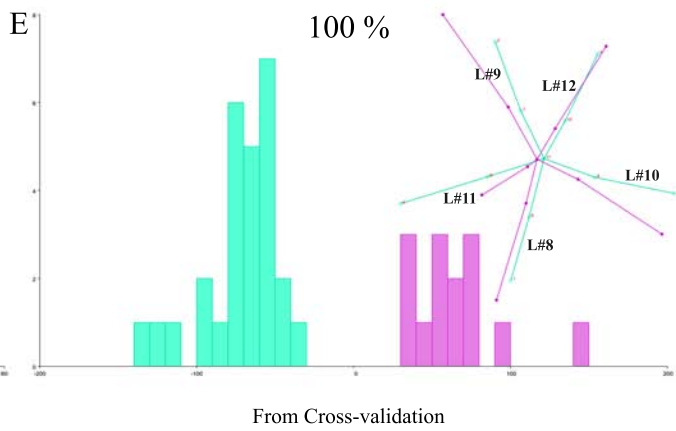

Figure 9

$MD_{\text{Mock,ORMV}} = 0.085$     $p = 0.005$   
 $D_{\text{ShapeMock,ORMV}} = 0.343$     $p = 0.037$   
 $\theta_{\text{Mock,ORMV}} = 16.46^\circ$     $p = 0.001$

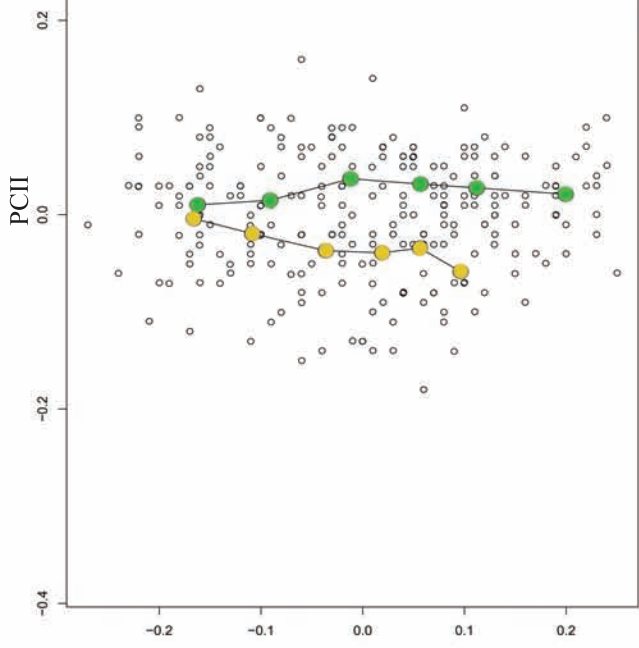

B

$MD_{\text{Mock,TuMV}} = 0.093$     $p = 0.015$   
 $D_{\text{ShapeMock,TuMV}} = 0.613$     $p = 0.001$   
 $\theta_{\text{Mock,TuMV}} = 34.41^\circ$     $p = 0.001$

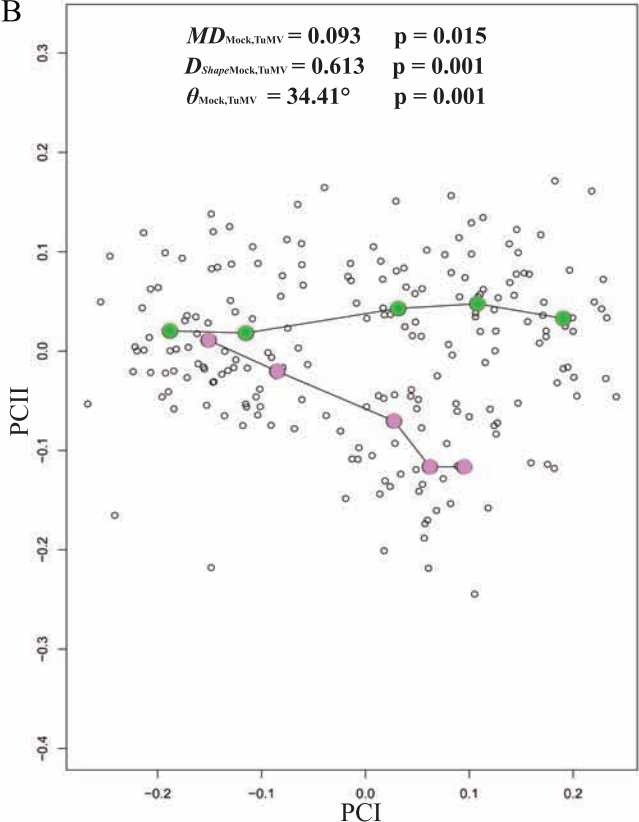

Click here to access/download;Figure;Figure 9.pdf

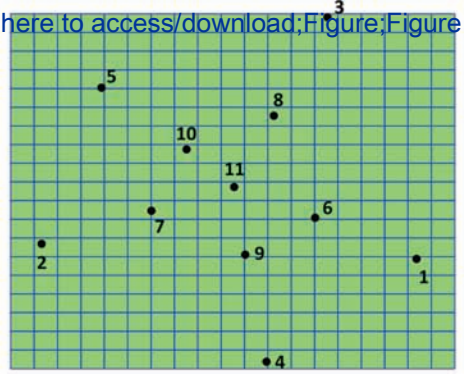

D

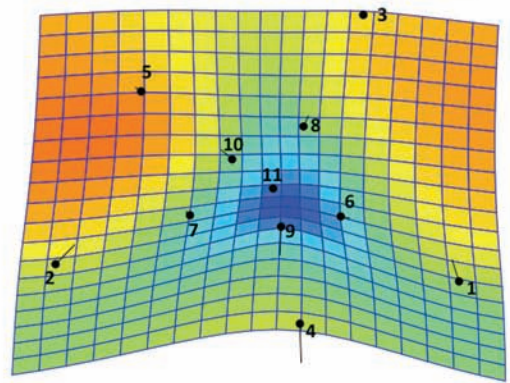

E

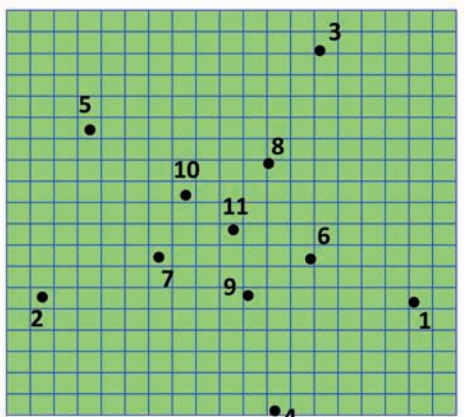

F

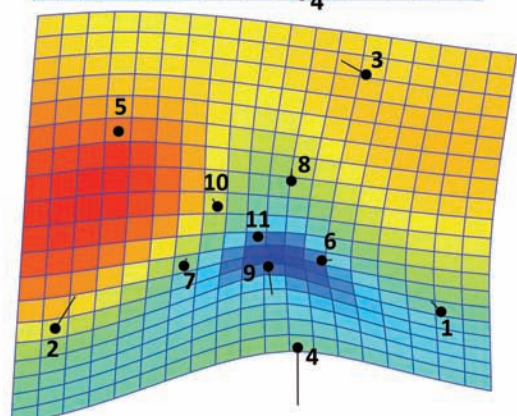



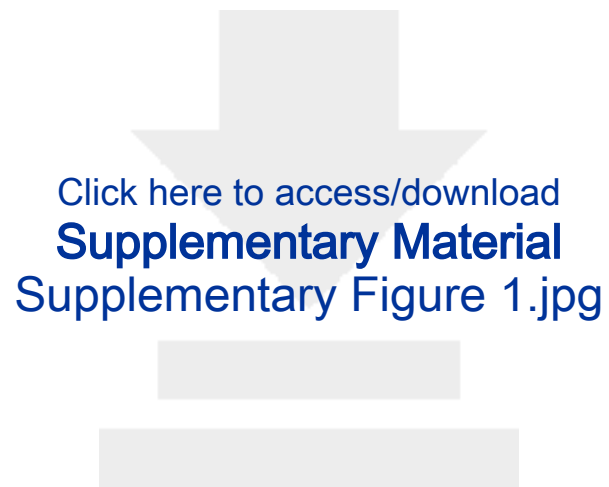

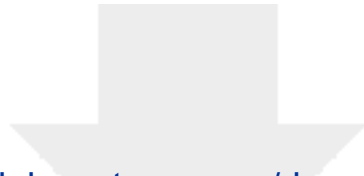

Click here to access/download  
**Supplementary Material**  
Supplementary Figure 2.pdf

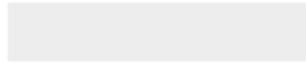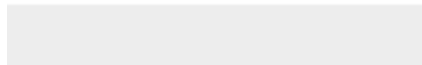



Click here to access/download  
**Supplementary Material**  
Supplementary Table 1.xlsx

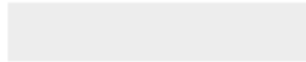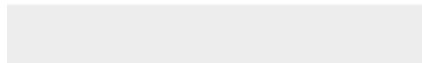



Click here to access/download  
**Supplementary Material**  
Supplementary Table 2.xlsx

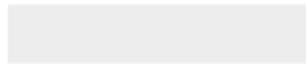



Click here to access/download  
**Supplementary Material**  
Supplementary Table 3.xlsx





Click here to access/download  
**Supplementary Material**  
Supplementary Table 4.xlsx

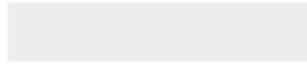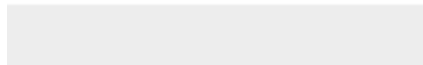



Click here to access/download  
**Supplementary Material**  
Supplementary Table 5.xlsx





Click here to access/download  
**Supplementary Material**  
Supplementary Table 6.xlsx





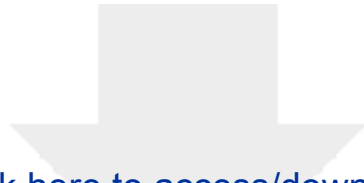

Click here to access/download  
**Supplementary Material**  
Supplementary file TuMV 2nd

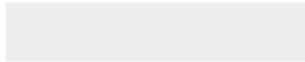

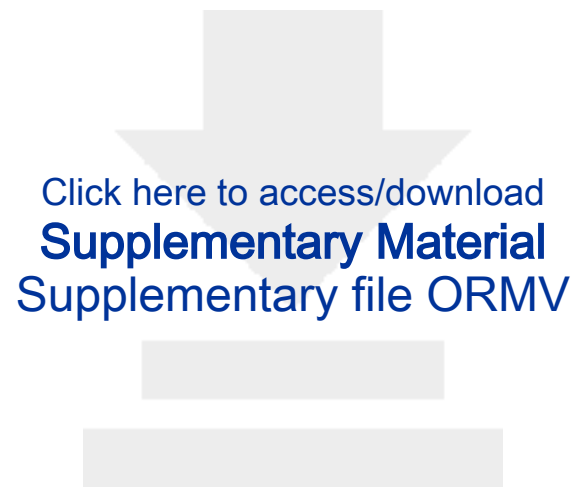



Click here to access/download  
**Supplementary Material**  
Supplementary file TuMV 1st



Supplement: giy073_giga-d-17-00284_revision_2.pdf [file giy073_giga-d-17-00284_revision_2.pdf]
